# Supplementary material for: Fluctuating selection across years and phenotypic variation in food-deceptive orchids
Source: PeerJ. 2017 Aug 25;5:e3704. doi: 10.7717/peerj.3704 (PMC5572944; doi:10.7717/peerj.3704)
Supplement: Data S1 — Morphological measurements and reproductive success of investigated individuals. [file peerj-05-3704-s002.xls]

## Sheet: Morphological measurements
id	species	year	fruit nb	plant eigth	flower nb	labellum width	labellum length	spurl	anthocyans tepals	anthocyans labellum	carotenoids tepals	carotenoids labellum
M1	M	2002	14	35	44	16.65	14.73	15.46	2.384	1.718	0.001	0.014
M3	M	2002	0	29	26	14.66	12.97	15.06	1.958	1.614	0.002	0.011
M6	M	2002	6	34	36	13.65	12.93	16.79	2.154	1.441	0.017	0.02
M8	M	2002	9	35	38	16.15	13.85	15.71	2.353	2.349	0.014	0.021
M9	M	2002	2	34	27	12.61	14.78	17.96	2.159	1.868	0.007	0.018
M21	M	2002	0	30	20	13.81	12.79	13.11	2.29	2.087	0.02	0.032
M22	M	2002	0	43	42	15.39	14.75	13.64	2.611	2.615	0.008	0.012
M23	M	2002	15	31	19	12.83	14.67	9.03	2.619	1.778	0.036	0.015
M24	M	2002	3	39	33	15.31	13.42	12.76	2.505	2.139	0.019	0.032
M25	M	2002	4	40	29	16.08	16.26	11.08	2.541	2.259	0.017	0.015
M26	M	2002	5	29	17	15.82	14.32	11.75	2.199	1.43	0.015	0.031
M27	M	2002	0	29	20	13.34	12.16	12.5	2.476	1.985	0.018	0.018
M28	M	2002	4	33	23	12.98	12.12	13.91	1.976	1.206	0.018	0.018
M29	M	2002	1	32	20	11.97	12.06	12.72	2.095	1.111	0.019	0.04
M30	M	2002	0	27	19	9.81	9.06	12.94	1.919	1.43	0.012	0.01
M31	M	2002	5	41	22	15.68	13.4	13.45	2.586	1.969	0.016	0.07
M32	M	2002	0	30	18	12.91	12.16	12.78	2.132	0.75	0.011	0.012
M33	M	2002	5	38	24	13.33	14.18	11.75	2.673	0.993	0.018	0.018
M34	M	2002	6	43	22	15.01	15.53	15.51	2.832	1.483	0.025	0.024
M35	M	2002	1	30	13	13.92	12.99	11.59	2.178	0.964	0.043	0.033
M36	M	2002	0	31	17	12.66	12.33	11.67	2.844	1.408	0.017	0.022
M37	M	2002	14	49	57	16.1	16.1	13.01	1.211	1.443	0.033	0.02
M38	M	2002	14	49	43	15.26	15.05	15.17	2.157	2.132	0.033	0.022
M39	M	2002	2	47	37	15.34	15.48	14.29	2.197	1.17	0.026	0.02
M40	M	2002	15	48	55	14.43	13.34	11.83	2.104	1.261	0.019	0.025
M41	M	2002	4	43	30	14.56	13.72	12.14	2.987	2.835	0.097	0.001
M42	M	2002	20	49	56	16.93	16.87	14.64	1.941	1.582	0.006	0.002
M43	M	2002	1	40	28	12.87	13.63	12.09	2.035	1.729	0.008	0.01
M44	M	2002	5	34	38	15.46	13.42	14.79	1.733	1.133	0.009	0.009
M45	M	2002	18	51	73	14.46	12.87	13.62	2.643	1.876	0.007	0.002
M46	M	2002	10	41	34	11.96	15.61	11.18	2.858	2.594	0.008	0.007
M47	M	2002	12	52	58	17.3	16.37	15.37	2.659	1.752	0.007	0.006
MS1	M	2002	6	45	22	16.16	15.24	16.01	3.132	2.385	0.093	0.068
MS2	M	2002	13	37	27	17.86	16.54	12.2	2.81	2.775	0.086	0.081
MS3	M	2002	1	33	16	13.12	12.59	16.73	3.131	1.669	0.029	0.074
MS4	M	2002	2	34	16	16.26	13.47	16.11	2.844	3.065	0.074	0.079
MS5	M	2002	1	27	13	15.26	13.82	14.41	2.89	2.625	0.097	0.109
MS6	M	2002	2	34	25	14.53	13.81	13.81	2.78	1.526	0.083	0.081
MS7	M	2002	5	27	21	13.82	13.32	14.62	2.77	1.355	0.054	0.077
MS8	M	2002	7	32	27	12.6	13.46	12.21	2.745	2.07	0.062	0.064
MS9	M	2002	7	39	33	13.46	13.08	14.68	2.633	1.829	0.062	0.068
MS10	M	2002	3	29	13	17.19	16.03	12.23	2.814	2.031	0.071	0.071
MS11	M	2002	4	31	30	13.33	13.39	14.24	2.414	1.07	0.07	0.07
MS12	M	2002	8	30	29	14.16	13.35	14.33	2.331	1.9	0.074	0.074
MS13	M	2002	3	30	21	13.05	13.78	13.58	2.854	1.092	0.041	0.041
MS14	M	2002	5	28	20	12.11	12.63	12.6	2.667	1.703	0.034	0.034
MS15	M	2002	2	30	29	13.13	12.72	11.75	1.735	1.561	0.023	0.023
MS16	M	2002	6	26	18	13.78	13.98	14.05	2.523	2.007	0.025	0.025
MS17	M	2002	1	30	16	13.94	13.89	16.3	2.883	1.527	0.021	0.021
MS19	M	2002	0	29	12	15.85	14.37	15.35	2.942	2.455	0.025	0.025
MS20	M	2002	3	24	17	14.03	11.18	14.32	3.13	1.847	0.027	0.027
MS21	M	2002	7	32	25	12.95	13.62	14.08	3.153	2.571	0.022	0.028
MS22	M	2002	2	20	8	14.06	13.23	12.72	2.847	2.331	0.027	0.031
MS23	M	2002	1	33	17	12.53	13.4	14.1	2.676	2.01	0.028	0.038
MS24	M	2002	7	30	22	15.92	15.89	12.48	2.998	2.102	0.021	0.041
MS25	M	2002	8	31	28	11.87	10.93	14.37	2.917	2.007	0.032	0.034
MS26	M	2002	2	33	23	11.6	10.65	13	2.317	1.11	0.035	0.04
MS27	M	2002	10	29	27	15.73	16.48	16.94	2.806	2.073	0.064	0.048
MS28	M	2002	3	25	17	14.14	14.2	13.3	2.842	2.669	0.055	0.045
MS29	M	2002	14	36	35	12.33	13.81	13.2	3.241	2.856	0.036	0.04
MS33	M	2002	8	32	26	13.88	13.98	15.48	2.063	2.055	0.041	0.04
MS35	M	2002	5	29	22	13.4	10.16	13.81	3.225	3.381	0.035	0.046
MS37	M	2002	5	38	17	11.72	11.62	14.04	2.76	1.67	0.045	0.051
MS38	M	2002	2	22	10	11.52	14.91	9.96	2.568	3.072	0.053	0.038
MS40	M	2002	11	31	23	11.52	13.04	12.49	2.871	2.267	0.052	0.054
MS41	M	2002	13	30	23	11.85	15.09	11.43	2.589	2.52	0.044	0.041
MS42	M	2002	11	38	30	13.21	13.95	12.64	2.763	2.142	0.043	0.039
MS43	M	2002	2	26	19	11.01	12.58	13.51	2.507	1.131	0.045	0.048
MS44	M	2002	7	29	20	14.9	14.41	13.96	2.822	2.505	0.055	0.126
MS45	M	2002	3	28	18	9.91	12.33	10.29	2.948	1.085	0.041	0.035
MS46	M	2002	11	35	29	13.72	13.66	11.62	2.116	1.305	0.053	0.04
MS47	M	2002	2	25	24	13.12	13.15	12.59	2.687	2.216	0.054	0.064
SD	M2002			7.17846	12.1028	1.74025	1.52492	1.73101	0.405222	0.58252	0.024191	0.0255746
MEAN	M2002			33.9306	26.4722	13.9413	13.6897	13.5394	2.55213	1.88436	0.03525	0.0373472
CV	M2002			0.211563	0.457189	0.124827	0.111391	0.127849	0.158778	0.309134	0.686269	0.68478	0.319087
PS1	P	2002	0	17	10	15.29	13.07	21.32	0.115	0.052	0.12	0.616
PS2	P	2002	5	20	14	17.58	13.06	22.02	0.053	0.064	0.184	0.655
PS3	P	2002	3	20	11	14.54	11.82	18.76	0.033	0.05	0.114	0.426
PS4	P	2002	2	18	10	14.79	12.78	22.68	0.024	0.038	0.135	0.2
PS5	P	2002	0	22	15	16.38	10.98	16.24	0.026	0.081	0.136	0.647
PS6	P	2002	6	23	20	14.76	11.76	15.89	0.045	0.049	0.082	0.43
PS7	P	2002	0	16	12	15.55	11.26	23	0.06	0.063	0.122	0.358
PS8	P	2002	2	23	16	14.04	12.92	17.34	0.021	0.045	0.106	0.461
PS9	P	2002	4	16	13	16.29	12.97	18.85	0.026	0.04	0.067	0.475
PS10	P	2002	5	17	8	15.75	12.98	18.47	0.027	0.057	0.102	0.784
PS11	P	2002	2	15	7	13.79	12.53	17.45	0.029	0.042	0.095	0.566
PS12	P	2002	3	18	9	15.55	12.71	18.89	0.057	0.042	0.055	0.405
PS13	P	2002	1	14	8	14.8	11.47	17.19	0.024	0.056	0.066	0.434
PS14	P	2002	2	20	11	16.13	11.97	19.03	0.027	0.077	0.047	0.29
PS15	P	2002	2	15	9	15.29	12.45	19.5	0.038	0.052	0.052	0.33
PS16	P	2002	2	16	9	16.71	13.22	21.08	0.028	0.077	0.07	0.359
PS17	P	2002	1	17	9	17.72	13.1	19.86	0.022	0.064	0.068	0.545
PS18	P	2002	2	14	6	14.17	11.39	19.16	0.031	0.058	0.052	0.452
PS19	P	2002	0	16	7	14.12	13.32	18.79	0.021	0.036	0.099	0.323
PS20	P	2002	1	15	9	14.37	12.57	19.96	0.025	0.052	0.091	0.402
PS21	P	2002	0	14	6	12.11	10.81	19.69	0.023	0.048	0.102	0.187
PS22	P	2002	2	15	8	16.26	13.04	20.9	0.026	0.041	0.162	0.364
PS23	P	2002	1	17	11	15.83	11.71	21.43	0.054	0.072	0.053	0.201
PS24	P	2002	3	19	6	16.09	13.31	19.15	0.041	0.068	0.133	0.383
PS25	P	2002	2	19	7	16.85	12.76	18.79	0.018	0.043	0.055	0.168
PS26	P	2002	2	18	11	16.43	13.74	20.12	0.016	0.056	0.142	0.172
PS27	P	2002	0	17	8	15.92	11.52	14.14	-0.018	0.049	0.117	0.216
PS28	P	2002	3	14	10	12.86	11.19	15.41	-0.01	0.06	0.278	0.707
PS29	P	2002	2	17	9	18.2	12.94	17.54	0.013	0.072	0.13	0.508
PS30	P	2002	3	18	8	16.72	14	17.56	0.046	0.112	0.169	0.601
PS31	P	2002	0	16	7	17.36	13.13	19.09	0.029	0.029	0.15	0.495
PS32	P	2002	1	14	11	15.4	10.83	16.85	0.004	0.08	0.162	0.464
PS33	P	2002	2	18	9	14.94	14.24	17.48	-0.012	0.018	0.084	0.317
PS34	P	2002	0	16	7	16.94	12.83	15.96	-0.007	0.045	0.117	0.432
PS35	P	2002	0	17	10	17.02	12	21.16	0.004	0.03	0.158	0.377
PS36	P	2002	2	14	11	16.93	12.19	16.3	-0.015	0.023	0.095	0.265
PS37	P	2002	1	16	7	16.6	13.69	20.85	-0.004	0.032	0.096	0.507
PS39	P	2002	3	15	7	17.42	13.41	20.49	-0.016	0.28	0.11	0.283
PS41	P	2002	2	19	9	16.85	12.78	19.79	-0.011	0.077	0.171	0.235
PS42	P	2002	6	17	11	18.79	15.19	20.54	0.036	0.033	0.18	0.408
PS44	P	2002	4	19	12	15.93	12.9	21.41	0.006	0.046	0.075	0.438
PS45	P	2002	4	19	9	15.33	13.2	20.83	-0.004	0.029	0.168	0.334
PS46	P	2002	0	14	8	15.68	14.29	18.35	0.001	0.057	0.175	0.86
PS47	P	2002	1	15	8	15.29	12.09	18.96	-0.013	0.06	0.097	0.408
PS48	P	2002	3	17	8	12.87	12.51	17.84	-0.007	0.055	0.118	0.48
PS49	P	2002	0	15	6	13.93	12.57	18.92	-0.011	0.059	0.095	0.517
PS50	P	2002	1	19	9	16.6	13.54	22.16	-0.01	0.024	0.091	0.357
P1	P	2002	1	11	5	11.94	10.58	17.23	0.004	0.012	0.074	0.099
P2	P	2002	0	8	3	12.63	12.37	14.87	0.007	0.023	0.111	0.14
P3	P	2002	1	6	3	9.03	8.84	11.45	0.005	0.015	0.143	0.154
P4	P	2002	0	6	4	10.71	11.72	14.04	0.005	0.017	0.085	0.213
P5	P	2002	2	9	6	13.64	11.91	18.81	0.008	0.027	0.09	0.285
P6	P	2002	0	9	6	11.1	10.55	17.29	0.009	0.028	0.196	0.313
P7	P	2002	0	10	7	11.2	10.98	12.31	0.007	0.023	0.13	0.249
P8	P	2002	0	8	5	11.86	11.63	17.93	0.007	0.024	0.089	0.183
P9	P	2002	1	10	4	11.26	9.49	16.73	0.014	0.045	0.051	0.077
P10	P	2002	0	15	5	11.62	10.04	15.06	0.009	0.028	0.041	0.088
P11	P	2002	0	14	5	14.81	11.98	16.76	0.01	0.032	0.019	0.12
P12	P	2002	3	13	6	14.1	11.56	17.47	0.025	0.084	0.065	0.137
P13	P	2002	2	17	5	13.78	11.75	19.27	0.009	0.029	0.149	0.266
P14	P	2002	0	13	7	12.08	10.37	13.51	0.007	0.024	0.208	0.366
P15	P	2002	0	13	4	13.96	11.48	15.48	0.006	0.021	0.09	0.305
P16	P	2002	0	12	5	9.77	9.69	13.78	0.008	0.026	0.061	0.133
P17	P	2002	0	12	6	11.16	10.02	17.18	0.007	0.024	0.119	0.153
P18	P	2002	2	14	6	17.19	12.76	13.02	0.014	0.048	0.095	0.148
P19	P	2002	1	11	6	12.73	11.15	16.86	0.031	0.104	0.01	0.182
P21	P	2002	2	10	7	11.31	11.61	13.99	0.007	0.023	0.12	0.102
P22	P	2002	0	10	5	13.02	11.34	15.28	0.009	0.031	0.242	0.33
P23	P	2002	3	14	13	13.95	11.33	17.42	0.007	0.024	0.104	0.345
P24	P	2002	0	11	6	12.39	10.72	15.79	0.067	0.022	0.163	0.195
P25	P	2002	0	7	5	15.12	11.78	15.93	0.069	0.023	0.091	0.099
P26	P	2002	1	10	5	14	11.24	14.19	0.015	0.049	0.18	0.388
P28	P	2002	0	13	4	14.22	10.81	15.9	0.016	0.054	0.13	0.241
P29	P	2002	0	8	7	13.52	10.18	11.29	0.036	0.12	0.064	0.051
P30	P	2002	0	7	3	NA	NA	NA	NA	NA	NA	NA
P31	P	2002	1	10	2	NA	NA	NA	NA	NA	NA	NA
P32	P	2002	0	9	3	13.09	10.4	16.73	0.008	0.027	0.124	0.04
P33	P	2002	0	7	2	NA	NA	NA	NA	NA	NA	NA
P34	P	2002	0	6	5	NA	NA	NA	NA	NA	NA	NA
P35	P	2002	2	11	6	14.76	11.49	19.32	0.044	0.147	0.104	0.305
P36	P	2002	0	13	4	15.09	13.43	17.37	0.035	0.115	0.094	0.591
P37	P	2002	0	8	6	15.26	14.42	18.73	0.034	0.112	0.075	0.334
P38	P	2002	0	12	3	NA	NA	NA	NA	NA	NA	NA
P39	P	2002	3	14	7	14.77	11.64	19.85	0.019	0.064	0.063	0.25
P40	P	2002	0	13	4	17.08	13.35	18.34	0.015	0.051	0.074	0.327
P41	P	2002	0	11	4	13.4	11.08	18.35	0.018	0.059	0.157	0.402
P42	P	2002	0	9	3	NA	NA	NA	NA	NA	NA	NA
P43	P	2002	0	14	5	16.77	12.14	16.95	0.039	0.129	0.105	0.209
P44	P	2002	0	11	4	12.77	10.45	19.54	0.006	0.019	0.056	0.166
P45	P	2002	0	10	7	13.08	12.63	18.31	0.017	0.057	0.065	0.163
P47	P	2002	3	13	7	15.36	8.36	17.39	0.029	0.096	0.113	0.575
P48	P	2002	0	9	5	14.08	12.98	15.69	0.044	0.146	0.091	0.523
P49	P	2002	1	9	4	16.77	13.47	17.56	0.054	0.179	0.091	0.392
P50	P	2002	0	9	5	12.74	12.07	16.37	0.046	0.154	0.084	0.245
P51	P	2002	3	13	9	14.17	11.73	17.58	0.036	0.119	0.101	0.229
P53	P	2002	0	14	7	17.6	13.55	17.49	0.019	0.064	0.134	0.533
P54	P	2002	1	17	9	15.76	11.94	18.34	0.017	0.057	0.11	0.442
SD	P2002			4.00609	3.1805	2.04065	1.26538	2.45588	0.0219787	0.0415233	0.0465654	0.171275
MEAN	P2002			13.8454	7.31959	14.653	12.0632	17.8015	0.0198791	0.0578901	0.108868	0.33989
CV	P2002			0.289345	0.434518	0.139265	0.104896	0.137959	1.10562	0.717279	0.427723	0.503912	0.428946
M6	M	2003	3	26	16	14.06	11.86	10.18	1.606	1.275	0.015	0.021
M7	M	2003	4	29	19	11.53	11.62	11.2	2.264	0.994	0.03	0.021
M22	M	2003	0	35	17	13.55	13.04	12.45	1.815	1.378	0.031	0.002
M34	M	2003	3	23	16	12.19	12.36	9.51	1.378	2.487	0.022	0.024
M50	M	2003	5	26	18	13.07	13.12	9.64	1.818	1.318	0.027	0.025
M51	M	2003	4	36	34	10.84	11.3	9.83	2.247	0.64	0.035	0.038
M52	M	2003	1	20	16	11.18	11.7	9.05	1.204	1.246	0.029	0.029
M53	M	2003	0	16	10	9.31	9.89	10.63	2.873	1.031	0.035	0.028
M54	M	2003	3	36	19	13.4	11.91	12.01	2.021	1.158	0.034	0.026
M55	M	2003	4	29	16	11.33	12.19	9.84	0.822	1.604	0.032	0.012
M59	M	2003	2	29	13	12.01	12.02	11.77	2.83	1.396	0.029	0.018
M60	M	2003	5	24	15	10.64	10.47	8.23	1.938	1.192	0.069	0.019
M62	M	2003	5	35	16	14.25	12.53	13.22	2.566	1.589	0.048	0.022
M63	M	2003	0	21	11	11.17	12.65	9.88	1.035	1.169	0.025	0.018
M69	M	2003	1	22	12	9.27	10.16	5.85	1.092	0.232	0.042	0.016
M70	M	2003	0	19	13	9.8	10.84	9.03	1.635	1.455	0.034	0.016
M72	M	2003	3	30	17	8.75	9.28	8.17	0.653	1.223	0.049	0.029
M74	M	2003	1	20	10	16.99	11.52	12.13	0.615	0.456	0.032	0.015
M79	M	2003	2	42	30	11.16	10.47	10.33	1.069	2.85	0.027	0.012
M80	M	2003	0	25	18	8.76	9.82	6.96	1.492	1.321	0.055	0.022
M81	M	2003	1	22	13	8.72	7.92	6.84	0.417	0.484	0.078	0.015
M82	M	2003	4	29	23	9.99	8.8	8.59	0.765	0.763	0.058	0.013
M83	M	2003	2	27	25	17.85	15.51	12.35	2.991	2.848	0.039	0.024
M84	M	2003	3	40	26	10.98	10.5	7.62	2.006	1.302	0.048	0.023
M85	M	2003	7	40	32	11.41	9.72	9.82	1.119	1.199	0.021	0.024
M86	M	2003	1	29	27	12.7	12.99	10.36	2.59	1.428	0.013	0.013
M87	M	2003	1	32	19	11.9	9.01	10.03	2.534	1.929	0.022	0.013
M88	M	2003	2	22	15	8.76	10.37	9.29	1.165	0.779	0.019	0.018
M89	M	2003	0	36	24	13.9	11.4	11.6	2.235	1.487	0.023	0.019
M90	M	2003	5	29	31	8.6	8.25	6.2	1.222	0.905	0.019	0.022
M91	M	2003	0	41	31	11.84	12.02	9.28	2.154	1.346	0.018	0.008
M92	M	2003	1	28	17	9.64	8.93	6.87	1.479	1.284	0.035	0.011
M93	M	2003	4	43	33	10.81	10.5	10.78	2.491	1.485	0.029	0.011
M95	M	2003	1	36	20	10.81	10.85	7.89	1.934	0.924	0.034	0.009
M96	M	2003	3	45	32	10.98	11.03	12.74	2.569	1.357	0.028	0.003
M97	M	2003	0	20	9	16.32	11.52	12.84	3.001	2.783	0.027	0.007
M98	M	2003	0	20	13	9.61	9.45	8.04	1.339	1.513	0.033	0.01
M99	M	2003	0	28	14	NA	NA	NA	NA	NA	NA	NA
M100	M	2003	0	15	9	NA	NA	NA	NA	NA	NA	NA
M101	M	2003	1	34	25	NA	NA	NA	NA	NA	NA	NA
M103	M	2003	0	23	16	NA	NA	NA	NA	NA	NA	NA
M104	M	2003	1	36	29	NA	NA	NA	NA	NA	NA	NA
M105	M	2003	0	26	14	NA	NA	NA	NA	NA	NA	NA
M106	M	2003	0	31	17	NA	NA	NA	NA	NA	NA	NA
M107	M	2003	0	20	14	NA	NA	NA	NA	NA	NA	NA
M108	M	2003	7	50	43	NA	NA	NA	NA	NA	NA	NA
M109	M	2003	0	20	10	NA	NA	NA	NA	NA	NA	NA
M110	M	2003	0	24	9	NA	NA	NA	NA	NA	NA	NA
M111	M	2003	0	22	18	NA	NA	NA	NA	NA	NA	NA
M113	M	2003	0	29	18	13.62	14	10.77	1.485	1.314	0.005	0.026
M115	M	2003	0	29	19	10.33	9.86	9.12	2.056	1.599	0.006	0.029
M116	M	2003	0	28	18	11.61	9.87	10.24	1.948	0.826	0.005	0.045
M117	M	2003	0	25	13	10.81	11.14	10.26	2.216	1.186	0.008	0.031
M118	M	2003	0	24	18	10.09	10.11	10.06	1.724	1.368	0.01	0.032
M119	M	2003	1	27	20	11.44	11.6	10	2.351	1.171	0.012	0.036
M120	M	2003	0	31	23	11.11	11.94	9.85	1.686	1.213	0.01	0.028
M121	M	2003	0	19	17	9.59	11.96	9.55	2.3	1.256	0.008	0.023
M123	M	2003	1	26	16	13.14	12.49	8.98	1.233	0.813	0.014	0.046
M125	M	2003	1	29	16	11.61	12.49	9.81	1.456	1.286	0.012	0.018
M126	M	2003	1	43	41	11.33	10.04	8.21	2.642	1.436	0.023	0.028
M127	M	2003	0	28	14	11.26	11	8.93	1.364	1.064	0.03	0.018
M128	M	2003	2	39	26	11.1	9.09	8.95	2.42	1.342	0.031	0.017
M129	M	2003	2	28	36	11.1	10.6	7.51	1.695	0.904	0.015	0.021
M130	M	2003	3	30	23	12.45	12.7	7.76	2.016	0.612	0.013	0.021
M131	M	2003	2	23	12	12.12	11.94	6.27	1.025	1.133	0.018	0.021
M132	M	2003	1	23	12	10.66	12.04	8.26	0.801	0.98	0.009	0.028
M133	M	2003	2	25	24	10.98	11.24	6.58	0.726	1.308	0.022	0.021
M134	M	2003	0	17	12	NA	NA	NA	NA	NA	NA	NA
M135	M	2003	1	19	14	NA	NA	NA	NA	NA	NA	NA
M136	M	2003	0	27	18	NA	NA	NA	NA	NA	NA	NA
M137	M	2003	1	21	7	NA	NA	NA	NA	NA	NA	NA
M138	M	2003	3	34	19	NA	NA	NA	NA	NA	NA	NA
M139	M	2003	0	30	20	NA	NA	NA	NA	NA	NA	NA
M140	M	2003	1	16	11	NA	NA	NA	NA	NA	NA	NA
M141	M	2003	0	22	13	NA	NA	NA	NA	NA	NA	NA
M142	M	2003	6	39	37	NA	NA	NA	NA	NA	NA	NA
M143	M	2003	0	17	13	NA	NA	NA	NA	NA	NA	NA
M144	M	2003	1	17	13	NA	NA	NA	NA	NA	NA	NA
M145	M	2003	0	19	16	NA	NA	NA	NA	NA	NA	NA
M146	M	2003	0	22	21	NA	NA	NA	NA	NA	NA	NA
M147	M	2003	0	28	26	NA	NA	NA	NA	NA	NA	NA
M148	M	2003	0	18	13	NA	NA	NA	NA	NA	NA	NA
M149	M	2003	0	19	14	NA	NA	NA	NA	NA	NA	NA
M150	M	2003	0	22	26	NA	NA	NA	NA	NA	NA	NA
M151	M	2003	0	29	22	NA	NA	NA	NA	NA	NA	NA
M152	M	2003	9	42	27	NA	NA	NA	NA	NA	NA	NA
M153	M	2003	3	25	20	NA	NA	NA	NA	NA	NA	NA
M154	M	2003	3	27	22	NA	NA	NA	NA	NA	NA	NA
M155	M	2003	3	27	20	NA	NA	NA	NA	NA	NA	NA
M156	M	2003	0	17	18	NA	NA	NA	NA	NA	NA	NA
M157	M	2003	6	31	26	NA	NA	NA	NA	NA	NA	NA
M158	M	2003	2	19	16	NA	NA	NA	NA	NA	NA	NA
M159	M	2003	1	19	15	NA	NA	NA	NA	NA	NA	NA
M160	M	2003	1	20	7	NA	NA	NA	NA	NA	NA	NA
M161	M	2003	2	20	18	NA	NA	NA	NA	NA	NA	NA
M162	M	2003	2	22	9	NA	NA	NA	NA	NA	NA	NA
M163	M	2003	0	16	13	NA	NA	NA	NA	NA	NA	NA
M164	M	2003	3	23	19	NA	NA	NA	NA	NA	NA	NA
M165	M	2003	2	19	15	NA	NA	NA	NA	NA	NA	NA
M166	M	2003	2	22	16	NA	NA	NA	NA	NA	NA	NA
M167	M	2003	1	20	18	NA	NA	NA	NA	NA	NA	NA
M168	M	2003	2	24	20	NA	NA	NA	NA	NA	NA	NA
M169	M	2003	0	18	15	NA	NA	NA	NA	NA	NA	NA
M170	M	2003	1	23	20	NA	NA	NA	NA	NA	NA	NA
M171	M	2003	3	28	29	NA	NA	NA	NA	NA	NA	NA
M172	M	2003	1	27	19	NA	NA	NA	NA	NA	NA	NA
M173	M	2003	0	16	15	NA	NA	NA	NA	NA	NA	NA
M174	M	2003	0	23	17	NA	NA	NA	NA	NA	NA	NA
M175	M	2003	3	29	18	NA	NA	NA	NA	NA	NA	NA
M176	M	2003	0	26	13	NA	NA	NA	NA	NA	NA	NA
M177	M	2003	3	17	16	NA	NA	NA	NA	NA	NA	NA
M178	M	2003	0	38	10	NA	NA	NA	NA	NA	NA	NA
M179	M	2003	1	19	21	NA	NA	NA	NA	NA	NA	NA
M180	M	2003	2	41	38	NA	NA	NA	NA	NA	NA	NA
M181	M	2003	0	39	15	NA	NA	NA	NA	NA	NA	NA
M182	M	2003	0	14	11	NA	NA	NA	NA	NA	NA	NA
M183	M	2003	3	18	19	NA	NA	NA	NA	NA	NA	NA
M184	M	2003	1	25	12	NA	NA	NA	NA	NA	NA	NA
M185	M	2003	1	20	21	NA	NA	NA	NA	NA	NA	NA
M186	M	2003	0	20	9	NA	NA	NA	NA	NA	NA	NA
M187	M	2003	1	20	16	NA	NA	NA	NA	NA	NA	NA
M188	M	2003	2	25	19	NA	NA	NA	NA	NA	NA	NA
M189	M	2003	0	17	13	NA	NA	NA	NA	NA	NA	NA
M190	M	2003	5	36	34	NA	NA	NA	NA	NA	NA	NA
M191	M	2003	1	20	23	NA	NA	NA	NA	NA	NA	NA
M192	M	2003	3	29	20	NA	NA	NA	NA	NA	NA	NA
M193	M	2003	1	33	27	NA	NA	NA	NA	NA	NA	NA
M194	M	2003	2	27	30	NA	NA	NA	NA	NA	NA	NA
M195	M	2003	0	21	20	NA	NA	NA	NA	NA	NA	NA
M196	M	2003	1	32	19	NA	NA	NA	NA	NA	NA	NA
M197	M	2003	3	29	20	NA	NA	NA	NA	NA	NA	NA
M198	M	2003	0	24	21	NA	NA	NA	NA	NA	NA	NA
M199	M	2003	0	36	26	10.79	9.35	9.38	2.499	0.705	0.031	0.016
M200	M	2003	2	35	24	12.4	9.64	11.14	2.071	0.865	0.006	0.001
M201	M	2003	9	32	20	11.11	12.02	10.03	2.828	1.789	0.016	0.017
M202	M	2003	0	25	9	10.95	11.04	9.96	2.607	1.276	0.014	0.012
M203	M	2003	7	32	34	11.25	10.12	NA	1.694	0.923	0.011	0.032
M204	M	2003	0	18	14	10.48	9.07	9.83	0.883	0.481	0.033	0.015
M205	M	2003	1	28	15	10.27	9.68	7.31	2.465	0.979	0.017	0.002
M206	M	2003	0	21	14	10.28	10.44	8.32	1.399	1.215	0.006	0.007
M207	M	2003	2	36	23	15.69	12.98	9.4	2.652	2.011	0.01	0.018
M208	M	2003	1	23	14	10.62	9.85	8.56	2.465	1.48	0.008	0.004
M209	M	2003	0	27	19	10.44	11.85	8.26	1.243	0.983	0.012	0.003
M210	M	2003	5	41	31	12.97	12.28	10.58	2.648	1.195	0.031	0.013
M211	M	2003	7	35	38	12.8	11.71	9.2	2.267	1.308	0.035	0.003
M212	M	2003	3	25	20	11.75	11.67	9.67	2.87	1.677	0.018	0.004
M213	M	2003	6	44	51	12.58	11.5	9.76	2.378	1.562	0.045	0.025
M214	M	2003	2	31	35	11.35	12	9.7	2.169	1.23	0.022	0.018
M215	M	2003	3	33	33	9.71	10.35	10.2	2.218	0.987	0.02	0.019
M216	M	2003	1	20	15	9.66	11.02	8.4	1.943	0.859	0.012	0.002
M217	M	2003	0	23	11	11	11.5	7.09	1.571	0.841	0.002	0.03
M218	M	2003	0	24	15	7.91	8.92	9.01	1.92	0.855	0.007	0.011
M219	M	2003	3	31	39	10.08	11.09	10.07	1.276	0.5	0.02	0.045
M220	M	2003	10	41	34	14.63	12.98	11.84	2.653	1.591	0.046	0.019
M221	M	2003	10	49	50	13.75	13.56	10.34	2.363	1.186	0.015	0.011
M222	M	2003	1	27	32	10.79	11.82	8.96	1.352	0.811	0.02	0.028
M223	M	2003	0	16	14	8.09	8.75	7.16	1.295	0.63	0.018	0.015
M224	M	2003	1	30	28	10.43	12.62	9.56	2.682	1.856	0.005	0.019
M225	M	2003	2	27	29	13.73	11.82	10.12	2.106	1.307	0.07	0.027
M226	M	2003	3	35	34	11.03	9.15	8.5	1.517	0.731	0.016	0.035
M227	M	2003	2	40	41	10.6	12.12	8.5	2.544	1.085	0.009	0.037
M228	M	2003	2	30	22	12.39	12.45	8.24	1.864	1.271	0.022	0.026
M229	M	2003	4	42	31	NA	NA	NA	NA	NA	NA	NA
M230	M	2003	6	31	34	NA	NA	NA	NA	NA	NA	NA
M231	M	2003	0	30	29	NA	NA	NA	NA	NA	NA	NA
M232	M	2003	4	31	26	NA	NA	NA	NA	NA	NA	NA
M233	M	2003	0	28	32	NA	NA	NA	NA	NA	NA	NA
M234	M	2003	0	28	35	NA	NA	NA	NA	NA	NA	NA
M235	M	2003	1	33	22	NA	NA	NA	NA	NA	NA	NA
M236	M	2003	3	34	27	NA	NA	NA	NA	NA	NA	NA
M237	M	2003	2	31	25	NA	NA	NA	NA	NA	NA	NA
M238	M	2003	17	46	38	NA	NA	NA	NA	NA	NA	NA
M239	M	2003	3	40	25	NA	NA	NA	NA	NA	NA	NA
M240	M	2003	4	38	29	NA	NA	NA	NA	NA	NA	NA
M241	M	2003	0	31	19	NA	NA	NA	NA	NA	NA	NA
M242	M	2003	1	33	32	NA	NA	NA	NA	NA	NA	NA
M243	M	2003	6	41	41	NA	NA	NA	NA	NA	NA	NA
M244	M	2003	3	40	30	NA	NA	NA	NA	NA	NA	NA
M245	M	2003	5	45	42	NA	NA	NA	NA	NA	NA	NA
M246	M	2003	4	45	31	NA	NA	NA	NA	NA	NA	NA
M247	M	2003	23	48	46	NA	NA	NA	NA	NA	NA	NA
M248	M	2003	6	38	28	NA	NA	NA	NA	NA	NA	NA
M249	M	2003	2	35	25	NA	NA	NA	NA	NA	NA	NA
M250	M	2003	1	23	14	NA	NA	NA	NA	NA	NA	NA
M251	M	2003	0	29	30	NA	NA	NA	NA	NA	NA	NA
M252	M	2003	0	20	10	NA	NA	NA	NA	NA	NA	NA
M253	M	2003	1	29	29	NA	NA	NA	NA	NA	NA	NA
M254	M	2003	3	36	25	NA	NA	NA	NA	NA	NA	NA
M255	M	2003	5	46	37	NA	NA	NA	NA	NA	NA	NA
M256	M	2003	0	20	9	NA	NA	NA	NA	NA	NA	NA
M257	M	2003	0	31	23	NA	NA	NA	NA	NA	NA	NA
M258	M	2003	0	23	15	NA	NA	NA	NA	NA	NA	NA
M259	M	2003	2	36	27	NA	NA	NA	NA	NA	NA	NA
M260	M	2003	6	40	21	NA	NA	NA	NA	NA	NA	NA
M261	M	2003	4	44	35	NA	NA	NA	NA	NA	NA	NA
M262	M	2003	3	42	28	NA	NA	NA	NA	NA	NA	NA
M263	M	2003	6	35	24	NA	NA	NA	NA	NA	NA	NA
M264	M	2003	7	31	23	NA	NA	NA	NA	NA	NA	NA
M265	M	2003	4	36	33	NA	NA	NA	NA	NA	NA	NA
M266	M	2003	2	37	51	NA	NA	NA	NA	NA	NA	NA
M267	M	2003	0	22	13	NA	NA	NA	NA	NA	NA	NA
M268	M	2003	3	28	20	NA	NA	NA	NA	NA	NA	NA
M269	M	2003	15	34	32	NA	NA	NA	NA	NA	NA	NA
M270	M	2003	5	35	29	NA	NA	NA	NA	NA	NA	NA
M271	M	2003	13	51	38	NA	NA	NA	NA	NA	NA	NA
M272	M	2003	10	36	35	NA	NA	NA	NA	NA	NA	NA
M273	M	2003	1	29	17	NA	NA	NA	NA	NA	NA	NA
M274	M	2003	0	27	26	NA	NA	NA	NA	NA	NA	NA
M275	M	2003	0	21	13	NA	NA	NA	NA	NA	NA	NA
M276	M	2003	1	18	11	NA	NA	NA	NA	NA	NA	NA
M277	M	2003	1	33	31	NA	NA	NA	NA	NA	NA	NA
M278	M	2003	0	18	8	NA	NA	NA	NA	NA	NA	NA
M279	M	2003	1	16	9	NA	NA	NA	NA	NA	NA	NA
M280	M	2003	0	19	6	NA	NA	NA	NA	NA	NA	NA
M281	M	2003	12	41	43	NA	NA	NA	NA	NA	NA	NA
M282	M	2003	0	29	22	NA	NA	NA	NA	NA	NA	NA
M283	M	2003	7	40	41	NA	NA	NA	NA	NA	NA	NA
M284	M	2003	0	15	9	NA	NA	NA	NA	NA	NA	NA
M285	M	2003	1	25	17	NA	NA	NA	NA	NA	NA	NA
M286	M	2003	1	29	33	NA	NA	NA	NA	NA	NA	NA
M287	M	2003	4	32	32	NA	NA	NA	NA	NA	NA	NA
M288	M	2003	0	31	27	NA	NA	NA	NA	NA	NA	NA
M289	M	2003	1	19	5	NA	NA	NA	NA	NA	NA	NA
M290	M	2003	3	27	16	NA	NA	NA	NA	NA	NA	NA
M291	M	2003	0	19	20	NA	NA	NA	NA	NA	NA	NA
M292	M	2003	4	16	9	NA	NA	NA	NA	NA	NA	NA
M293	M	2003	5	34	28	NA	NA	NA	NA	NA	NA	NA
M294	M	2003	3	27	13	NA	NA	NA	NA	NA	NA	NA
M295	M	2003	0	23	18	NA	NA	NA	NA	NA	NA	NA
M296	M	2003	1	32	29	NA	NA	NA	NA	NA	NA	NA
M297	M	2003	2	31	21	NA	NA	NA	NA	NA	NA	NA
M298	M	2003	1	22	15	NA	NA	NA	NA	NA	NA	NA
2Ms1	M	2003	1	37	26	14.15	11.65	12.23	2.757	2.057	0.012	0.08
2Ms2	M	2003	0	28	18	15.74	13.65	11.41	2.557	1.816	0.017	0.08
2Ms4	M	2003	0	28	16	14.52	11.83	10.63	2.8	1.784	0.011	0.017
2Ms5	M	2003	0	53	44	17.56	14.51	13.22	3.032	2.99	0.014	0.012
2Ms7	M	2003	0	35	24	13.47	12.28	9.21	1.683	0.526	0.012	0.035
2Ms8	M	2003	0	49	37	16.2	14.6	13.53	2.16	0.975	0.015	0.019
2Ms9	M	2003	3	35	17	12.27	13.48	10.11	1.492	0.431	0.027	0.018
2Ms10	M	2003	0	38	17	15.52	13.83	13.57	1.672	1.188	0.018	0.07
2Ms11	M	2003	6	49	36	14.32	13	10.1	2.893	0.952	0.008	0.017
2Ms12	M	2003	1	29	19	11.91	12.69	8.92	1.982	0.879	0.012	0.02
2Ms13	M	2003	1	30	25	14.08	12.54	12.05	1.791	1.166	0.012	0.016
2Ms14	M	2003	0	34	25	11.42	12.1	10.17	0.543	0.371	0.016	0.02
2Ms15	M	2003	0	30	26	12.25	11.67	10.77	1.922	0.851	0.026	0.031
2Ms16	M	2003	0	25	19	11.91	11.66	11.95	2.686	1.95	0.012	0.019
2Ms17	M	2003	0	23	21	10.75	11.42	7.4	1.081	0.394	0.013	0.018
2Ms18	M	2003	0	28	21	11.42	12.35	11.35	2.399	1.322	0.01	0.013
2Ms19	M	2003	0	27	14	14.15	13.64	10.44	2.243	0.81	0.022	0.018
2Ms20	M	2003	0	20	15	9.93	10.52	8.47	0.487	0.25	0.014	0.02
2Ms21	M	2003	0	32	20	13.3	10.75	9.18	1.254	0.651	0.013	0.018
2Ms22	M	2003	0	28	12	13.26	12.28	12.3	1.921	1.017	0.012	0.021
2Ms23	M	2003	3	26	16	13.64	13.48	10.2	1.892	1.028	0.02	0.03
2Ms24	M	2003	1	28	21	12.79	11.44	10.59	2.621	2.186	0.023	0.09
2Ms26	M	2003	5	35	41	14.49	12.96	10.85	1.892	0.983	0.016	0.035
2Ms27	M	2003	1	34	34	13.81	12.79	11.78	1.874	1.069	0.009	0.023
2Ms33	M	2003	1	21	10	12.79	11.74	6.98	1.316	0.507	0.021	0.045
2Ms34	M	2003	0	20	7	12.19	10.32	8.94	2.387	0.954	0.021	0.04
2Ms35	M	2003	0	24	13	13.55	12.27	11.24	1.828	0.594	0.021	0.045
2Ms36	M	2003	0	23	12	13.04	12.11	10.21	2.29	0.613	0.04	0.043
2Ms37	M	2003	0	24	20	18.27	14.45	13.06	2.932	2.953	0.05	0.047
2Ms38	M	2003	0	23	17	10.4	9.81	10.92	2.01	1.174	0.019	0.05
2Ms39	M	2003	7	34	27	9.58	10.97	11.75	2.732	0.76	0.044	0.054
2Ms40	M	2003	2	37	27	13.15	12.32	11.03	2.77	1.9	0.031	0.055
2Ms41	M	2003	1	28	16	8.63	11.42	10.97	1.958	1.156	0.023	0.048
2Ms42	M	2003	0	21	7	11.85	11.94	11.13	1.801	1.078	0.024	0.041
2Ms43	M	2003	2	29	20	12.27	11.51	13.26	2.79	1.515	0.021	0.048
2Ms44	M	2003	2	33	15	13.61	12.33	15.6	2.418	1.477	0.028	0.049
2Ms45	M	2003	0	20	16	9.99	10.44	10.98	1.972	1.309	0.025	0.052
2Ms46	M	2003	1	24	15	10.87	11.36	10.24	2.158	2.138	0.028	0.046
2Ms51	M	2003	0	22	12	10.84	11.87	9.74	1.343	1.232	0.014	0.048
2Ms52	M	2003	8	21	13	13.6	12.36	10.91	2.207	1.622	0.019	0.05
2Ms55	M	2003	3	30	37	13.82	12.22	12.09	2.417	1.552	0.015	0.051
3Ms5	M	2003	1	32	21	11.44	13.63	11.47	2.372	1.421	0.029	0.013
3Ms11	M	2003	2	50	36	1.49	14.47	14.9	2.936	2.934	0.036	0.037
3Ms12	M	2003	5	41	37	13.63	14.71	12.84	2.216	1.622	0.028	0.033
3Ms16	M	2003	0	38	21	9.99	13.9	10.55	2.025	0.695	0.018	0.014
3Ms17	M	2003	2	32	25	8.13	10.89	8.49	1.896	1.033	0.022	0.022
3Ms18	M	2003	0	20	19	7.11	11.31	9.33	1.085	0.507	0.025	0.058
3Ms21	M	2003	0	35	33	11.01	13.55	11.91	2.364	1.77	0.03	0.018
3Ms22	M	2003	0	30	14	12.7	12.79	9.48	2.134	1.398	0.037	0.019
3Ms23	M	2003	0	18	8	9.31	11.85	9.4	1.035	0.681	0.029	0.012
3Ms26	M	2003	2	26	12	16.02	14.83	17.04	1.125	1.853	0.021	0.011
3Ms27	M	2003	7	36	16	11.99	11.55	12.97	2.209	1.787	0.049	0.019
3Ms28	M	2003	2	29	13	11.59	12.47	10.92	0.608	1.027	0.019	0.018
3Ms29	M	2003	6	27	9	12.1	13.3	13.5	1.757	1.448	0.017	0.015
3Ms32	M	2003	6	63	41	17.05	14.74	14.66	2.635	1.887	0.031	0.015
SD	M2003			8.41985	9.38062	2.29076	1.4998	1.9481	0.644625	0.550638	0.0136083	0.0161119
MEAN	M2003			28.892	21.6307	11.8345	11.6395	10.1309	1.92807	1.25052	0.0235071	0.0251071
CV	M2003			0.291425	0.433672	0.193566	0.128854	0.192293	0.334336	0.440327	0.578902	0.641725	0.359456
2Ps1	P	2003	1	15	9	NA	14.15	11.59	0.045	0.063	0.17	0.901
2Ps2	P	2003	0	18	7	NA	15.02	13.07	0.015	0.034	0.101	0.574
2Ps3	P	2003	0	16	7	NA	13.3	9.35	0.012	0.023	0.111	0.827
2Ps4	P	2003	0	15	7	NA	12.3	11.6	0.01	0.035	0.097	0.455
2Ps5	P	2003	0	18	9	NA	13.65	10.91	0.036	0.071	0.07	0.612
2Ps6	P	2003	0	18	10	NA	14.8	11.06	0.02	0.049	0.121	1.282
2Ps7	P	2003	1	14	8	NA	12.48	9.59	0.006	0.026	0.064	0.247
2Ps8	P	2003	0	15	6	NA	14.47	11.11	0.012	0.031	0.178	1.005
2Ps9	P	2003	0	12	4	NA	11.27	9.26	0.012	0.022	0.105	0.543
2Ps10	P	2003	0	18	11	NA	14.47	9.76	0.016	0.032	0.13	0.936
2Ps11	P	2003	0	13	10	NA	13.29	12.62	0.018	0.052	0.093	0.237
2Ps12	P	2003	0	12	6	NA	16.8	12.71	0.017	0.049	0.183	0.857
2Ps13	P	2003	1	15	8	NA	14.63	11.28	0.005	0.025	0.037	0.068
2Ps14	P	2003	0	16	6	NA	12.45	9.42	0.008	0.021	0.044	0.137
2Ps15	P	2003	0	21	6	NA	14.61	11.73	0.011	0.027	0.067	0.351
2Ps17	P	2003	1	16	6	NA	14.13	9.76	0.015	0.025	0.101	0.607
2Ps18	P	2003	2	15	8	NA	12.95	11.35	0.017	0.037	0.128	0.443
2Ps19	P	2003	0	24	14	NA	15.71	12.52	0.01	0.018	0.063	0.178
2Ps20	P	2003	2	19	12	NA	14.47	12.81	0.021	0.031	0.379	0.46
2Ps21	P	2003	0	14	6	NA	17.22	12.96	0.016	0.064	NA	0.858
2Ps22	P	2003	0	16	8	NA	13.79	12.78	0.025	0.054	0.058	0.752
2Ps23	P	2003	4	16	6	NA	15.52	14.64	0.016	0.042	0.21	1.098
2Ps27	P	2003	0	12	5	NA	13.65	10.91	0.009	0.059	0.183	0.569
2Ps28	P	2003	0	11	7	NA	11.27	10.14	0.01	0.028	0.113	0.539
2Ps29	P	2003	0	12	5	NA	12.5	10.47	0.011	0.051	0.108	0.898
2Ps30	P	2003	0	8	5	NA	11.76	7.91	0.009	0.02	0.121	0.384
2Ps31	P	2003	0	9	5	NA	11.93	10.43	0.01	0.028	0.12	0.625
2Ps32	P	2003	0	12	10	NA	12.16	10.71	0.006	0.026	0.083	0.766
2Ps33	P	2003	0	15	5	NA	17.05	13.24	0.011	0.053	0.11	0.827
2Ps34	P	2003	2	23	17	NA	16.5	14.55	0.016	0.045	0.225	1.208
2Ps40	P	2003	0	13	6	NA	11.93	12.24	0.013	0.025	0.072	0.245
2Ps41	P	2003	0	14	11	NA	15.86	11.86	0.013	0.028	0.081	0.259
2Ps42	P	2003	0	12	7	NA	15.51	11.28	0.012	0.035	0.124	0.605
2Ps43	P	2003	0	15	7	NA	12.11	11.25	0.01	0.025	0.72	0.401
2Ps45	P	2003	0	15	5	NA	15.1	12.22	0.012	0.025	0.096	0.752
2Ps48	P	2003	0	18	7	NA	12.96	10.41	0.39	0.031	0.142	0.377
2Ps49	P	2003	0	14	6	NA	13.49	11.16	0.012	0.027	0.111	0.594
2Ps50	P	2003	0	15	8	NA	15.55	11.76	0.019	0.035	0.238	0.767
3Ps1	P	2003	2	21	10	15.48	12.19	18.36	0.02	0.055	0.136	1.309
3Ps2	P	2003	4	19	4	14.3	11.11	16.17	0.012	0.044	0.137	1.252
3Ps3	P	2003	4	20	6	16.85	10.26	16.08	0.014	0.065	0.049	1.136
3Ps4	P	2003	0	17	4	14.81	12.3	19.34	0.016	0.055	0.051	1.014
3Ps5	P	2003	2	18	9	15.31	10.93	19.28	0.012	0.049	0.026	0.834
3Ps6	P	2003	2	15	6	12.78	11.1	15.87	0.027	0.029	0.039	0.92
3Ps7	P	2003	0	21	5	14.65	11.28	17.1	0.012	0.056	0.043	0.595
3Ps8	P	2003	1	17	4	13.94	10.23	17.46	0.016	0.042	0.091	0.469
3Ps9	P	2003	5	21	8	12.5	7.74	17.15	0.013	0.045	0.035	0.126
3Ps10	P	2003	0	12	3	13.14	11.84	16.85	0.012	0.023	0.082	0.07
3Ps11	P	2003	0	26	16	16.65	12.12	17.23	0.033	0.066	0.061	1.355
3Ps12	P	2003	2	14	4	11.11	10.46	15.57	0.027	0.036	0.042	0.167
3Ps13	P	2003	0	17	4	14	10.43	15.61	0.013	0.036	0.073	0.754
3Ps14	P	2003	0	9	4	12.97	11.94	13.43	0.009	0.026	0.044	0.438
3Ps15	P	2003	0	11	4	14.3	8.58	12.71	0.014	0.027	0.11	0.694
3Ps16	P	2003	1	16	5	15.64	12.48	17.68	0.018	0.046	0.232	1.598
3Ps17	P	2003	1	24	5	11.89	11.44	15.21	0.01	0.029	0.047	0.68
3Ps21	P	2003	0	17	4	12.28	10.95	14.29	0.029	0.029	0.133	0.659
3Ps22	P	2003	1	10	3	15.67	11.44	15.78	0.03	0.022	0.02	0.941
3Ps24	P	2003	0	18	7	12.47	9.94	14.33	0.016	0.04	0.088	0.576
3Ps27	P	2003	1	18	4	15.65	10.93	14.76	0.007	0.039	0.045	0.638
3Ps28	P	2003	1	20	9	14.31	11.63	17.97	0.026	0.031	0.133	0.567
3Ps29	P	2003	1	15	4	15.49	12.46	17.07	0.013	0.082	0.078	0.292
3Ps31	P	2003	0	16	3	13.58	12.8	12.56	0.012	0.059	0.027	0.173
3Ps32	P	2003	1	16	9	11.45	10.79	15.55	0.023	0.036	0.098	0.56
3Ps33	P	2003	1	21	4	15.14	12.79	10.81	0.01	0.168	0.035	0.443
3Ps34	P	2003	1	18	7	16.3	11.55	15.91	0.042	0.132	0.084	0.747
3Ps35	P	2003	1	22	7	14.8	12.52	18.27	0.014	0.055	0.086	1.505
3Ps36	P	2003	0	19	4	14.09	10.13	17.58	0.02	0.074	0.134	1.267
3Ps37	P	2003	2	18	9	15.75	9.37	18.57	0.014	0.049	0.102	1.182
3Ps38	P	2003	1	23	6	14.3	10.63	13.63	0.017	0.052	0.098	0.961
3Ps39	P	2003	4	20	11	14.63	12.58	17.18	0.039	0.025	0.17	1.948
3Ps40	P	2003	2	17	4	12.71	11.99	14.73	0.012	0.145	0.087	0.652
3Ps41	P	2003	0	20	7	14.82	13.13	15.58	0.009	0.051	0.213	1.328
3Ps42	P	2003	0	19	8	16.99	12.5	18.14	0.012	0.042	0.061	1.253
3Ps43	P	2003	1	22	8	13.13	12.11	15.62	0.017	NA	0.12	1.327
3Ps44	P	2003	1	15	7	9.25	9.1	13.59	0.013	NA	0.057	1.125
3Ps45	P	2003	0	13	8	11.84	9.27	13.46	0.01	0.067	0.059	0.784
3Ps46	P	2003	0	14	6	13.46	10.6	13.3	0.014	0.061	0.051	0.825
3Ps48	P	2003	1	15	5	13.13	9.59	16.17	0.015	0.049	0.043	1.089
3Ps50	P	2003	1	17	10	16.34	10.93	14.37	0.01	0.04	0.065	1.115
P169	P	2003	0	14	4	NA	NA	NA	NA	NA	NA	NA
P170	P	2003	0	19	4	NA	NA	NA	NA	NA	NA	NA
P171	P	2003	0	16	5	NA	NA	NA	NA	NA	NA	NA
P172	P	2003	0	19	11	NA	NA	NA	NA	NA	NA	NA
P173	P	2003	1	22	7	NA	NA	NA	NA	NA	NA	NA
P174	P	2003	0	18	4	NA	NA	NA	NA	NA	NA	NA
P175	P	2003	0	12	4	NA	NA	NA	NA	NA	NA	NA
P176	P	2003	0	14	3	NA	NA	NA	NA	NA	NA	NA
P177	P	2003	0	13	4	NA	NA	NA	NA	NA	NA	NA
P178	P	2003	2	21	8	NA	NA	NA	NA	NA	NA	NA
P179	P	2003	1	15	3	NA	NA	NA	NA	NA	NA	NA
P180	P	2003	1	17	6	NA	NA	NA	NA	NA	NA	NA
P181	P	2003	0	13	4	NA	NA	NA	NA	NA	NA	NA
P182	P	2003	0	11	3	NA	NA	NA	NA	NA	NA	NA
P183	P	2003	0	16	1	NA	NA	NA	NA	NA	NA	NA
P184	P	2003	0	13	3	NA	NA	NA	NA	NA	NA	NA
P185	P	2003	0	12	2	NA	NA	NA	NA	NA	NA	NA
P186	P	2003	0	16	6	NA	NA	NA	NA	NA	NA	NA
P187	P	2003	0	22	4	NA	NA	NA	NA	NA	NA	NA
P188	P	2003	1	22	7	NA	NA	NA	NA	NA	NA	NA
P189	P	2003	0	13	3	NA	NA	NA	NA	NA	NA	NA
P190	P	2003	0	17	4	NA	NA	NA	NA	NA	NA	NA
P191	P	2003	0	12	3	NA	NA	NA	NA	NA	NA	NA
P192	P	2003	1	14	2	NA	NA	NA	NA	NA	NA	NA
P193	P	2003	0	17	5	NA	NA	NA	NA	NA	NA	NA
P194	P	2003	0	22	4	NA	NA	NA	NA	NA	NA	NA
P195	P	2003	1	13	4	NA	NA	NA	NA	NA	NA	NA
P196	P	2003	0	13	4	NA	NA	NA	NA	NA	NA	NA
P197	P	2003	1	9	2	NA	NA	NA	NA	NA	NA	NA
P198	P	2003	0	12	3	NA	NA	NA	NA	NA	NA	NA
P199	P	2003	1	10	3	NA	NA	NA	NA	NA	NA	NA
P200	P	2003	0	17	6	NA	NA	NA	NA	NA	NA	NA
P201	P	2003	0	12	3	NA	NA	NA	NA	NA	NA	NA
P202	P	2003	0	14	2	NA	NA	NA	NA	NA	NA	NA
P203	P	2003	0	16	4	NA	NA	NA	NA	NA	NA	NA
P204	P	2003	1	18	7	NA	NA	NA	NA	NA	NA	NA
P205	P	2003	0	16	4	NA	NA	NA	NA	NA	NA	NA
P206	P	2003	1	17	6	NA	NA	NA	NA	NA	NA	NA
P207	P	2003	0	16	4	NA	NA	NA	NA	NA	NA	NA
P208	P	2003	0	11	4	NA	NA	NA	NA	NA	NA	NA
P209	P	2003	3	24	9	NA	NA	NA	NA	NA	NA	NA
P210	P	2003	1	19	6	NA	NA	NA	NA	NA	NA	NA
P211	P	2003	1	17	8	NA	NA	NA	NA	NA	NA	NA
P212	P	2003	0	18	6	NA	NA	NA	NA	NA	NA	NA
P213	P	2003	1	17	3	NA	NA	NA	NA	NA	NA	NA
P214	P	2003	1	18	6	NA	NA	NA	NA	NA	NA	NA
P215	P	2003	0	14	7	NA	NA	NA	NA	NA	NA	NA
P216	P	2003	0	13	6	NA	NA	NA	NA	NA	NA	NA
P217	P	2003	0	14	4	NA	NA	NA	NA	NA	NA	NA
P218	P	2003	0	21	8	NA	NA	NA	NA	NA	NA	NA
P219	P	2003	3	17	7	16.34	19.34	13.53	0.014	0.02	0.098	0.564
P220	P	2003	0	15	7	11.49	19.04	15.34	0.02	0.035	0.136	0.392
P222	P	2003	1	14	3	12.05	17.69	14.57	0.004	0.012	0.059	0.327
P223	P	2003	1	16	3	11.78	17.87	16.34	0.013	0.013	0.053	0.153
P224	P	2003	0	15	4	12.13	17.03	15.02	0.003	0.015	NA	0.245
P225	P	2003	1	16	6	16.21	12.64	17.92	0.011	0.022	NA	0.1
P226	P	2003	1	13	3	12.02	11.69	15.74	0.013	0.012	0.073	0.381
P227	P	2003	3	15	3	15.45	13.92	16.63	0.006	0.03	0.101	0.235
P228	P	2003	5	18	8	15.06	11.24	14.81	0.004	0.032	0.208	0.181
P229	P	2003	0	19	10	15.83	12	17.26	0.012	0.028	0.104	0.238
P230	P	2003	2	14	4	15.19	12.51	17.66	0.013	0.016	0.076	0.145
P231	P	2003	0	14	4	17.1	12.07	16.07	0.003	0.02	NA	0.542
P232	P	2003	1	19	11	13.28	11.74	15.33	0.01	0.034	0.089	0.082
P233	P	2003	1	16	5	17.59	12.37	19.21	0.021	0.041	0.18	0.668
P234	P	2003	1	19	6	15.17	10.64	19.56	0.004	0.018	0.054	0.075
P235	P	2003	1	15	6	15.57	12.9	19.19	0.015	0.025	0.136	0.523
P236	P	2003	1	13	4	13.53	9.85	15.15	0.007	0.015	0.162	0.108
P237	P	2003	1	16	3	14.09	11.78	16.31	0.018	0.019	0.085	0.462
P238	P	2003	3	15	5	13.15	9.32	16.83	0.01	0.009	0.041	0.081
P239	P	2003	0	16	5	13.54	12.25	15.23	0.014	0.02	0.096	NA
P240	P	2003	0	17	3	11.87	10.89	21.11	0.006	0.007	NA	0.172
P241	P	2003	0	16	6	16.72	18.87	19.4	0.005	0.072	0.048	0.634
P242	P	2003	1	17	6	11.23	18.16	14.34	0	0.017	0.105	0.572
P243	P	2003	1	16	5	12.28	14.98	13.17	0.002	0.021	0.054	0.074
P244	P	2003	1	11	6	11.95	14.61	14.34	0.005	0.025	0.12	0.325
P245	P	2003	0	14	4	13.27	13.64	15.61	0.011	0.051	0.101	0.158
P246	P	2003	3	13	5	11.23	15.62	14.55	0.013	0.066	0.082	0.313
P247	P	2003	0	14	7	12.06	10.13	14.61	0.003	0.015	0.078	0.61
P248	P	2003	0	17	8	13.01	10.14	16.18	0.005	0.009	0.085	0.385
P249	P	2003	0	17	5	13.34	8.87	16.78	0.01	0.016	0.099	0.348
P250	P	2003	0	9	4	13.51	11.02	15.1	0.006	0.008	0.081	0.341
P251	P	2003	0	14	4	14.5	10.79	14.5	0.008	0.018	0.125	0.698
P252	P	2003	0	16	3	11.49	10.69	16.4	0.004	0.008	0.056	0.225
P253	P	2003	0	10	3	15.01	12.58	16.25	0.011	NA	0.233	0.896
P254	P	2003	0	15	5	12.96	9.02	18.41	0.006	0.012	0.053	0.218
P255	P	2003	0	17	7	15.02	10.92	18.93	0.008	0.034	0.107	0.716
P256	P	2003	0	14	4	13.61	11.55	16.45	0.01	0.012	0.065	0.293
P257	P	2003	0	16	6	14.07	8.86	18.2	0.007	0.007	0.138	0.4
P258	P	2003	0	11	4	11.93	10.01	16.6	0.006	0.014	0.088	0.419
P259	P	2003	0	20	8	16.04	12.64	21.97	0.012	0.04	0.081	0.874
P260	P	2003	0	17	4	13.7	10.14	19.13	0.006	0.012	0.073	0.543
P261	P	2003	1	15	5	10.42	8.9	17.7	0.005	0.007	0.043	0.167
P262	P	2003	0	10	5	11.49	10.38	14.91	0.003	0.008	0.068	0.329
P263	P	2003	1	15	4	14.5	10.93	17.59	0.006	0.02	0.084	0.541
P264	P	2003	1	14	4	12.99	12.08	18.93	0.007	0.012	0.09	0.559
P265	P	2003	2	18	6	15.16	10.96	16.8	0.008	0.03	0.094	0.599
P266	P	2003	1	16	6	12.57	9.63	15.16	0.009	0.008	0.065	0.513
P267	P	2003	0	14	5	10.9	8.99	15.31	0.004	0.003	0.081	0.249
P268	P	2003	3	12	5	14.51	11.85	16.36	0.007	0.013	0.088	0.317
P269	P	2003	0	15	5	13.98	11.67	18.37	0.006	0.019	0.037	0.44
P270	P	2003	0	12	3	13.09	11.31	13.79	0.013	0.027	0.086	0.418
P271	P	2003	0	11	4	14.21	10.67	17.35	0.01	0.014	0.047	0.685
P272	P	2003	2	15	5	17.08	12.88	19.84	0.012	0.017	0.116	0.655
P273	P	2003	1	17	3	12.83	12.33	16.12	0.004	0.017	0.045	0.613
P274	P	2003	0	11	5	13.91	10.58	15.78	0.006	0.028	0.036	0.493
P275	P	2003	0	12	2	13.09	10.05	14.91	0.009	0.027	0.067	0.541
P276	P	2003	1	20	7	14.76	11.29	15.28	0.01	0.021	0.096	0.728
P277	P	2003	0	14	3	14.56	11.94	15.93	0.01	0.025	0.06	0.716
P278	P	2003	0	18	10	14.01	10.58	18.15	0.006	NA	0.034	0.394
P279	P	2003	0	16	2	14	12.06	16.84	0.012	0.01	0.026	0.355
P280	P	2003	0	15	3	11.8	10.92	15.42	0.012	0.013	0.043	0.819
P281	P	2003	0	18	5	14.88	11.04	14.66	0.013	0.026	0.068	0.421
P282	P	2003	2	18	4	14.62	11.03	17.21	0.011	0.022	0.047	0.53
P283	P	2003	0	13	4	11.04	8.85	12.51	0.007	0.007	0.067	0.295
P284	P	2003	0	15	4	14.77	11.97	17.72	0.008	NA	0.08	0.485
P285	P	2003	1	12	3	12.77	10.2	16.13	0.008	0.008	0.08	0.484
P286	P	2003	0	15	2	14.11	11.56	18.15	0.008	0.009	0.085	0.529
P287	P	2003	1	12	2	14.26	11.72	19.08	0.007	0.023	0.034	NA
P288	P	2003	0	13	2	14.41	10.97	16.79	0.009	0.02	0.062	0.623
P289	P	2003	0	17	8	16.43	11.57	18.83	0.012	0.03	0.047	0.734
P290	P	2003	0	13	2	16.93	11.67	17	NA	0.009	0.066	0.594
P291	P	2003	0	13	5	14.35	11.1	14.61	NA	0.015	0.072	0.775
P292	P	2003	0	20	10	14.98	11.73	17.29	0.009	0.023	0.032	0.344
P293	P	2003	0	21	4	14.89	12.39	17.9	0.005	0.017	0.051	0.545
P294	P	2003	0	16	3	12.54	11.14	18.6	0.01	0.056	0.063	0.249
P295	P	2003	0	15	6	13.27	11.13	15.03	0.008	0.043	0.06	0.305
P296	P	2003	1	15	5	12.9	11.35	16.1	0.01	0.012	0.061	0.494
P297	P	2003	0	13	3	14.83	11.73	17.42	0.004	0.009	0.046	0.284
P298	P	2003	0	23	12	12.32	11.23	13.56	0.01	0.031	0.028	0.543
P299	P	2003	1	14	4	14.27	11.12	16.68	0.03	0.08	NA	0.684
P300	P	2003	2	18	6	18.74	12.06	18.33	0.006	0.024	0.054	0.738
P301	P	2003	0	22	10	18.85	12.26	15.52	0.008	0.056	0.075	0.788
P302	P	2003	0	16	5	16.98	10.7	17.29	0.005	0.017	0.057	NA
P303	P	2003	1	20	4	13.33	12.39	18.85	0.007	0.02	0.086	0.641
P304	P	2003	0	17	3	15.86	12.38	15.58	0.028	0.021	0.063	0.725
P305	P	2003	0	20	3	14.86	12.83	17.37	0.007	0.015	0.055	0.409
P306	P	2003	1	22	3	17.28	15.79	24.02	0.012	0.03	0.093	0.75
P307	P	2003	0	14	3	14.69	12.92	16.61	0.032	0.046	0.06	0.562
P308	P	2003	0	16	2	14.57	11.65	19.51	0.008	0.009	0.03	0.445
P309	P	2003	0	15	2	15.22	12.77	18.97	0.012	0.025	0.067	0.405
P310	P	2003	1	18	2	15.74	11.35	14.89	0.013	0.029	0.045	0.512
P311	P	2003	0	13	2	16.64	13.28	19.53	0.014	0.026	0.037	0.491
P312	P	2003	1	16	3	17.42	12.38	18.65	0.007	0.014	0.037	0.429
P313	P	2003	1	17	3	15.2	12.72	18.62	0.013	0.026	0.065	0.547
P314	P	2003	0	20	4	16.63	11.48	20.55	0.022	0.016	0.047	0.298
P315	P	2003	1	14	3	16.03	11.53	16.01	0.015	0.017	0.067	0.4
P316	P	2003	1	19	4	16.52	12.51	19.36	0.022	0.027	0.086	0.609
P317	P	2003	0	11	3	16.16	12.36	15.81	0.045	0.012	0.017	0.543
P318	P	2003	0	18	3	15.13	12.81	18.85	0.009	0.014	0.014	0.326
P319	P	2003	0	13	6	NA	NA	NA	NA	NA	NA	NA
P320	P	2003	1	12	4	NA	NA	NA	NA	NA	NA	NA
P321	P	2003	0	11	4	NA	NA	NA	NA	NA	NA	NA
P322	P	2003	0	12	5	NA	NA	NA	NA	NA	NA	NA
P323	P	2003	0	17	7	NA	NA	NA	NA	NA	NA	NA
P324	P	2003	0	14	6	NA	NA	NA	NA	NA	NA	NA
P325	P	2003	1	16	7	NA	NA	NA	NA	NA	NA	NA
P326	P	2003	0	13	4	NA	NA	NA	NA	NA	NA	NA
P327	P	2003	1	15	10	NA	NA	NA	NA	NA	NA	NA
P328	P	2003	1	14	8	NA	NA	NA	NA	NA	NA	NA
P329	P	2003	0	14	4	NA	NA	NA	NA	NA	NA	NA
P330	P	2003	0	15	3	NA	NA	NA	NA	NA	NA	NA
P331	P	2003	3	22	12	NA	NA	NA	NA	NA	NA	NA
P332	P	2003	0	13	7	NA	NA	NA	NA	NA	NA	NA
P333	P	2003	0	12	3	NA	NA	NA	NA	NA	NA	NA
P334	P	2003	0	18	9	NA	NA	NA	NA	NA	NA	NA
P335	P	2003	1	14	6	NA	NA	NA	NA	NA	NA	NA
P336	P	2003	0	17	9	NA	NA	NA	NA	NA	NA	NA
P337	P	2003	0	13	5	NA	NA	NA	NA	NA	NA	NA
P338	P	2003	0	19	8	NA	NA	NA	NA	NA	NA	NA
P339	P	2003	0	14	5	NA	NA	NA	NA	NA	NA	NA
P340	P	2003	0	17	5	NA	NA	NA	NA	NA	NA	NA
P341	P	2003	2	14	7	NA	NA	NA	NA	NA	NA	NA
P342	P	2003	0	11	4	NA	NA	NA	NA	NA	NA	NA
P343	P	2003	0	11	3	NA	NA	NA	NA	NA	NA	NA
P344	P	2003	0	9	2	NA	NA	NA	NA	NA	NA	NA
P345	P	2003	0	10	5	NA	NA	NA	NA	NA	NA	NA
P346	P	2003	0	12	4	NA	NA	NA	NA	NA	NA	NA
P347	P	2003	1	16	6	NA	NA	NA	NA	NA	NA	NA
P348	P	2003	1	17	7	NA	NA	NA	NA	NA	NA	NA
P349	P	2003	0	14	3	NA	NA	NA	NA	NA	NA	NA
P350	P	2003	1	14	5	NA	NA	NA	NA	NA	NA	NA
P351	P	2003	0	14	4	NA	NA	NA	NA	NA	NA	NA
P352	P	2003	0	18	6	NA	NA	NA	NA	NA	NA	NA
P353	P	2003	0	11	3	NA	NA	NA	NA	NA	NA	NA
P354	P	2003	1	13	4	NA	NA	NA	NA	NA	NA	NA
P355	P	2003	0	17	7	NA	NA	NA	NA	NA	NA	NA
P356	P	2003	0	18	4	NA	NA	NA	NA	NA	NA	NA
P357	P	2003	0	17	5	NA	NA	NA	NA	NA	NA	NA
P358	P	2003	2	20	6	NA	NA	NA	NA	NA	NA	NA
P359	P	2003	0	15	4	NA	NA	NA	NA	NA	NA	NA
P360	P	2003	1	19	5	NA	NA	NA	NA	NA	NA	NA
P361	P	2003	0	18	9	NA	NA	NA	NA	NA	NA	NA
P362	P	2003	0	14	3	NA	NA	NA	NA	NA	NA	NA
P363	P	2003	0	12	3	NA	NA	NA	NA	NA	NA	NA
P364	P	2003	1	20	4	NA	NA	NA	NA	NA	NA	NA
P365	P	2003	1	16	5	NA	NA	NA	NA	NA	NA	NA
P366	P	2003	0	17	6	NA	NA	NA	NA	NA	NA	NA
P367	P	2003	0	18	7	NA	NA	NA	NA	NA	NA	NA
P368	P	2003	0	15	4	NA	NA	NA	NA	NA	NA	NA
P377	P	2003	0	19	9	12.46	10.98	15.85	0.204	0.056	0.135	0.362
P381	P	2003	1	23	13	14.85	13.36	16.61	0.036	0.037	0.173	0.954
P382	P	2003	0	15	5	13.9	11.06	15.08	0.012	0.02	0.145	0.769
P383	P	2003	0	15	6	11.67	9.58	13.19	0.013	0.018	0.133	0.322
P384	P	2003	0	13	4	14.4	12.94	16.55	0.19	0.087	0.104	0.591
P385	P	2003	0	15	9	13.02	11.44	14.02	0.122	0.073	0.113	0.428
P386	P	2003	0	16	8	13.43	12.44	15.9	0.012	0.031	0.142	0.896
P387	P	2003	1	11	5	14.49	9.84	17.91	0.013	0.019	0.136	0.525
P388	P	2003	0	14	5	11.65	11.61	12.47	0.111	0.073	0.126	0.276
P390	P	2003	3	18	4	14.65	10.53	15.52	0.013	0.023	0.115	0.345
P392	P	2003	0	16	4	14.32	11.47	16.75	0.008	0.016	0.105	0.32
P394	P	2003	2	12	4	11.33	11.32	15.34	0.023	0.023	0.125	0.252
P395	P	2003	0	14	4	12.34	10.08	16.17	0.019	0.023	0.152	0.941
P398	P	2003	0	20	8	13.3	12.24	15.83	NA	NA	NA	NA
P399	P	2003	0	20	6	12.04	9.87	14.17	0.016	0.055	0.275	1.374
P401	P	2003	0	16	4	12.11	11.87	17.92	0.013	0.021	0.126	0.709
P402	P	2003	0	14	5	11.31	9.96	13.26	0.009	0.022	0.132	0.491
P403	P	2003	0	14	5	11.92	9.6	12.05	0.01	0.017	0.113	0.341
P404	P	2003	0	11	5	13.85	11.03	21.65	0.011	0.01	0.241	0.645
P405	P	2003	0	15	6	14.58	10.87	16.54	0.011	0.02	0.19	0.331
P409	P	2003	1	13	5	11.35	10.16	17.5	0.009	0.034	0.098	0.849
P410	P	2003	0	16	6	12.28	12.2	16.32	0.016	0.036	0.236	1.309
P411	P	2003	0	14	6	16.07	11.39	17.11	0.01	0.05	0.158	1.258
P412	P	2003	0	14	11	12.94	9.93	16.2	0.014	0.033	0.176	1.727
P418	P	2003	0	14	4	13.7	11.12	16.19	0.007	0.016	0.124	0.47
P419	P	2003	2	17	7	NA	NA	NA	NA	NA	NA	NA
P420	P	2003	0	10	3	NA	NA	NA	NA	NA	NA	NA
P421	P	2003	1	15	6	NA	NA	NA	NA	NA	NA	NA
P422	P	2003	3	14	8	NA	NA	NA	NA	NA	NA	NA
P423	P	2003	1	13	7	NA	NA	NA	NA	NA	NA	NA
P424	P	2003	5	18	5	NA	NA	NA	NA	NA	NA	NA
P425	P	2003	3	14	6	NA	NA	NA	NA	NA	NA	NA
P426	P	2003	2	16	7	NA	NA	NA	NA	NA	NA	NA
P427	P	2003	0	10	3	NA	NA	NA	NA	NA	NA	NA
P428	P	2003	2	14	4	NA	NA	NA	NA	NA	NA	NA
P429	P	2003	0	13	7	NA	NA	NA	NA	NA	NA	NA
P430	P	2003	2	12	4	NA	NA	NA	NA	NA	NA	NA
P431	P	2003	2	17	8	NA	NA	NA	NA	NA	NA	NA
P432	P	2003	1	16	10	NA	NA	NA	NA	NA	NA	NA
P433	P	2003	1	14	6	NA	NA	NA	NA	NA	NA	NA
P434	P	2003	4	18	7	NA	NA	NA	NA	NA	NA	NA
P435	P	2003	2	15	7	NA	NA	NA	NA	NA	NA	NA
P436	P	2003	2	9	5	NA	NA	NA	NA	NA	NA	NA
P437	P	2003	2	10	5	NA	NA	NA	NA	NA	NA	NA
P438	P	2003	3	14	6	NA	NA	NA	NA	NA	NA	NA
P439	P	2003	0	13	2	NA	NA	NA	NA	NA	NA	NA
P440	P	2003	1	10	2	NA	NA	NA	NA	NA	NA	NA
P441	P	2003	1	15	8	NA	NA	NA	NA	NA	NA	NA
P442	P	2003	0	11	7	NA	NA	NA	NA	NA	NA	NA
P443	P	2003	1	10	6	NA	NA	NA	NA	NA	NA	NA
P444	P	2003	3	15	5	NA	NA	NA	NA	NA	NA	NA
P445	P	2003	0	15	5	NA	NA	NA	NA	NA	NA	NA
P446	P	2003	0	13	3	NA	NA	NA	NA	NA	NA	NA
P447	P	2003	0	12	3	NA	NA	NA	NA	NA	NA	NA
P448	P	2003	1	11	3	NA	NA	NA	NA	NA	NA	NA
P449	P	2003	2	10	3	NA	NA	NA	NA	NA	NA	NA
P450	P	2003	2	9	4	NA	NA	NA	NA	NA	NA	NA
P451	P	2003	3	10	4	NA	NA	NA	NA	NA	NA	NA
P452	P	2003	1	12	4	NA	NA	NA	NA	NA	NA	NA
P453	P	2003	0	12	4	NA	NA	NA	NA	NA	NA	NA
P454	P	2003	1	12	3	NA	NA	NA	NA	NA	NA	NA
P455	P	2003	2	13	7	NA	NA	NA	NA	NA	NA	NA
P456	P	2003	1	12	6	NA	NA	NA	NA	NA	NA	NA
P457	P	2003	0	17	7	NA	NA	NA	NA	NA	NA	NA
P458	P	2003	0	11	2	NA	NA	NA	NA	NA	NA	NA
P459	P	2003	1	13	3	NA	NA	NA	NA	NA	NA	NA
P460	P	2003	0	9	4	NA	NA	NA	NA	NA	NA	NA
P461	P	2003	0	14	4	NA	NA	NA	NA	NA	NA	NA
P462	P	2003	2	10	4	NA	NA	NA	NA	NA	NA	NA
P463	P	2003	1	12	4	NA	NA	NA	NA	NA	NA	NA
P464	P	2003	0	13	4	NA	NA	NA	NA	NA	NA	NA
P465	P	2003	2	11	3	NA	NA	NA	NA	NA	NA	NA
P466	P	2003	0	24	7	NA	NA	NA	NA	NA	NA	NA
P467	P	2003	0	14	3	NA	NA	NA	NA	NA	NA	NA
P468	P	2003	0	13	5	NA	NA	NA	NA	NA	NA	NA
P469	P	2003	0	17	6	14.75	10.45	12.54	0.013	0.021	0.034	0.188
P470	P	2003	0	18	7	15.48	11.61	16.82	0.007	0.025	0.052	0.17
P471	P	2003	0	14	3	10.52	10.31	13.5	0.012	0.066	0.092	0.198
P472	P	2003	0	11	4	11.35	10.53	15.03	0.01	0.056	0.097	0.271
P473	P	2003	0	12	5	12.19	11.68	17.15	0.014	0.018	0.04	0.055
P474	P	2003	0	11	3	15.37	12.47	18.4	0.004	0.01	0.045	0.045
P475	P	2003	0	16	5	13.2	11.4	15.01	0.007	0.038	0.089	0.053
P476	P	2003	0	13	4	13.8	11.78	17.06	0.01	0.011	0.045	0.172
P477	P	2003	0	14	3	13.4	9.71	15.04	0.009	0.01	0.062	0.169
P478	P	2003	0	9	3	17.02	12.46	18.63	0.008	0.037	0.064	0.086
P479	P	2003	0	18	5	13.09	10.24	13.54	0.008	0.032	0.086	0.125
P480	P	2003	4	19	7	13.63	12.34	21.86	0.007	0.03	0.067	0.144
P481	P	2003	2	13	4	12.83	12.42	16.24	0.016	0.035	0.059	0.172
P482	P	2003	2	19	6	14.12	11.65	15.96	0.057	0.037	0.042	0.087
P483	P	2003	0	22	6	14.37	14.2	14.69	0.019	0.028	0.097	0.218
P484	P	2003	0	16	4	14.58	11.3	15.8	0.008	0.027	0.076	0.256
P485	P	2003	0	17	9	12.5	10.66	15.61	0.017	0.031	0.075	0.291
P486	P	2003	0	16	3	14.24	11.55	15.24	0.027	0.028	0.171	0.308
P487	P	2003	0	13	3	13.87	11.91	16.1	0.006	0.012	0.147	0.291
P488	P	2003	0	13	6	16.32	11.59	17.07	0.01	0.021	0.141	0.104
P489	P	2003	0	22	5	14.9	10.56	17.74	0.007	0.02	0.082	0.202
P490	P	2003	1	18	4	14.99	12.79	15.59	0.005	0.026	0.073	0.17
P491	P	2003	0	15	3	14.4	11.26	16.6	0.006	0.026	0.197	0.342
P492	P	2003	0	17	5	13.63	10.94	13.72	0.014	0.023	0.245	0.248
P493	P	2003	0	17	5	13.57	11.45	15.49	0.007	0.02	0.128	0.243
P494	P	2003	1	17	5	NA	NA	NA	NA	NA	NA	NA
P495	P	2003	4	21	8	NA	NA	NA	NA	NA	NA	NA
P496	P	2003	2	14	5	NA	NA	NA	NA	NA	NA	NA
P497	P	2003	0	14	5	NA	NA	NA	NA	NA	NA	NA
P498	P	2003	0	15	6	NA	NA	NA	NA	NA	NA	NA
P499	P	2003	0	16	7	NA	NA	NA	NA	NA	NA	NA
P500	P	2003	0	14	3	NA	NA	NA	NA	NA	NA	NA
P501	P	2003	2	13	4	NA	NA	NA	NA	NA	NA	NA
P502	P	2003	2	17	6	NA	NA	NA	NA	NA	NA	NA
P503	P	2003	5	18	6	NA	NA	NA	NA	NA	NA	NA
P504	P	2003	3	18	7	NA	NA	NA	NA	NA	NA	NA
P505	P	2003	1	12	5	NA	NA	NA	NA	NA	NA	NA
P506	P	2003	2	10	3	NA	NA	NA	NA	NA	NA	NA
P507	P	2003	2	13	6	NA	NA	NA	NA	NA	NA	NA
P508	P	2003	4	20	7	NA	NA	NA	NA	NA	NA	NA
P509	P	2003	0	12	4	NA	NA	NA	NA	NA	NA	NA
P510	P	2003	0	14	2	NA	NA	NA	NA	NA	NA	NA
P511	P	2003	3	16	8	NA	NA	NA	NA	NA	NA	NA
P512	P	2003	0	13	3	NA	NA	NA	NA	NA	NA	NA
P513	P	2003	2	16	5	NA	NA	NA	NA	NA	NA	NA
P514	P	2003	0	13	3	NA	NA	NA	NA	NA	NA	NA
P515	P	2003	0	16	3	NA	NA	NA	NA	NA	NA	NA
P516	P	2003	5	20	10	NA	NA	NA	NA	NA	NA	NA
P517	P	2003	3	20	5	NA	NA	NA	NA	NA	NA	NA
P518	P	2003	0	9	5	NA	NA	NA	NA	NA	NA	NA
P519	P	2003	1	11	4	NA	NA	NA	NA	NA	NA	NA
P520	P	2003	0	14	6	NA	NA	NA	NA	NA	NA	NA
P521	P	2003	2	17	6	NA	NA	NA	NA	NA	NA	NA
P522	P	2003	0	12	5	NA	NA	NA	NA	NA	NA	NA
P523	P	2003	1	14	6	NA	NA	NA	NA	NA	NA	NA
P524	P	2003	2	24	12	NA	NA	NA	NA	NA	NA	NA
P525	P	2003	0	10	4	NA	NA	NA	NA	NA	NA	NA
P526	P	2003	0	11	3	NA	NA	NA	NA	NA	NA	NA
P527	P	2003	0	9	3	NA	NA	NA	NA	NA	NA	NA
P528	P	2003	0	10	3	NA	NA	NA	NA	NA	NA	NA
P529	P	2003	0	9	3	NA	NA	NA	NA	NA	NA	NA
P530	P	2003	2	13	3	NA	NA	NA	NA	NA	NA	NA
P531	P	2003	1	10	4	NA	NA	NA	NA	NA	NA	NA
P532	P	2003	0	12	6	NA	NA	NA	NA	NA	NA	NA
P533	P	2003	0	11	5	NA	NA	NA	NA	NA	NA	NA
P534	P	2003	0	12	4	NA	NA	NA	NA	NA	NA	NA
P535	P	2003	2	10	4	NA	NA	NA	NA	NA	NA	NA
P536	P	2003	0	10	4	NA	NA	NA	NA	NA	NA	NA
P537	P	2003	0	9	2	NA	NA	NA	NA	NA	NA	NA
P538	P	2003	0	12	3	NA	NA	NA	NA	NA	NA	NA
P539	P	2003	1	9	3	NA	NA	NA	NA	NA	NA	NA
P540	P	2003	1	8	3	NA	NA	NA	NA	NA	NA	NA
P541	P	2003	0	12	3	NA	NA	NA	NA	NA	NA	NA
P542	P	2003	0	10	4	NA	NA	NA	NA	NA	NA	NA
P543	P	2003	2	11	4	NA	NA	NA	NA	NA	NA	NA
P544	P	2003	0	16	6	NA	NA	NA	NA	NA	NA	NA
P545	P	2003	0	8	3	NA	NA	NA	NA	NA	NA	NA
P546	P	2003	2	17	5	NA	NA	NA	NA	NA	NA	NA
P547	P	2003	2	14	4	NA	NA	NA	NA	NA	NA	NA
P548	P	2003	0	11	5	NA	NA	NA	NA	NA	NA	NA
P549	P	2003	1	18	4	NA	NA	NA	NA	NA	NA	NA
P550	P	2003	0	12	3	NA	NA	NA	NA	NA	NA	NA
P551	P	2003	0	12	3	NA	NA	NA	NA	NA	NA	NA
P552	P	2003	0	12	5	NA	NA	NA	NA	NA	NA	NA
P553	P	2003	1	16	4	NA	NA	NA	NA	NA	NA	NA
P554	P	2003	0	15	3	NA	NA	NA	NA	NA	NA	NA
P555	P	2003	3	16	6	NA	NA	NA	NA	NA	NA	NA
P556	P	2003	0	12	4	NA	NA	NA	NA	NA	NA	NA
P557	P	2003	1	10	4	NA	NA	NA	NA	NA	NA	NA
P558	P	2003	0	8	4	NA	NA	NA	NA	NA	NA	NA
P559	P	2003	0	11	5	NA	NA	NA	NA	NA	NA	NA
P560	P	2003	0	11	4	NA	NA	NA	NA	NA	NA	NA
P561	P	2003	11	24	12	NA	NA	NA	NA	NA	NA	NA
P562	P	2003	1	14	3	NA	NA	NA	NA	NA	NA	NA
P563	P	2003	1	16	5	NA	NA	NA	NA	NA	NA	NA
P564	P	2003	1	13	6	NA	NA	NA	NA	NA	NA	NA
P565	P	2003	2	15	6	NA	NA	NA	NA	NA	NA	NA
P566	P	2003	1	15	7	NA	NA	NA	NA	NA	NA	NA
P567	P	2003	0	13	4	NA	NA	NA	NA	NA	NA	NA
P568	P	2003	1	10	3	NA	NA	NA	NA	NA	NA	NA
P569	P	2003	2	12	4	NA	NA	NA	NA	NA	NA	NA
P570	P	2003	1	14	4	NA	NA	NA	NA	NA	NA	NA
P571	P	2003	1	13	7	NA	NA	NA	NA	NA	NA	NA
P572	P	2003	0	12	7	NA	NA	NA	NA	NA	NA	NA
P573	P	2003	0	15	5	NA	NA	NA	NA	NA	NA	NA
P574	P	2003	0	16	4	NA	NA	NA	NA	NA	NA	NA
P575	P	2003	1	18	7	NA	NA	NA	NA	NA	NA	NA
P576	P	2003	0	14	5	NA	NA	NA	NA	NA	NA	NA
P577	P	2003	0	18	4	NA	NA	NA	NA	NA	NA	NA
P578	P	2003	5	20	8	NA	NA	NA	NA	NA	NA	NA
P579	P	2003	0	14	3	NA	NA	NA	NA	NA	NA	NA
P580	P	2003	1	13	4	NA	NA	NA	NA	NA	NA	NA
P581	P	2003	2	16	4	NA	NA	NA	NA	NA	NA	NA
P582	P	2003	1	12	4	NA	NA	NA	NA	NA	NA	NA
P583	P	2003	3	14	6	NA	NA	NA	NA	NA	NA	NA
P584	P	2003	0	14	5	NA	NA	NA	NA	NA	NA	NA
P585	P	2003	0	16	4	NA	NA	NA	NA	NA	NA	NA
P586	P	2003	1	15	8	NA	NA	NA	NA	NA	NA	NA
P587	P	2003	4	18	10	NA	NA	NA	NA	NA	NA	NA
P588	P	2003	2	17	7	NA	NA	NA	NA	NA	NA	NA
P589	P	2003	3	13	6	NA	NA	NA	NA	NA	NA	NA
P590	P	2003	0	14	7	NA	NA	NA	NA	NA	NA	NA
P591	P	2003	1	11	5	NA	NA	NA	NA	NA	NA	NA
P592	P	2003	2	17	8	NA	NA	NA	NA	NA	NA	NA
P593	P	2003	0	12	5	NA	NA	NA	NA	NA	NA	NA
SD	P2003			3.36338	2.29673	1.72712	1.97727	2.70307	0.0328873	0.0220248	0.0681515	0.350162
MEAN	P2003			15.0042	5.2887	14.0191	12.0299	15.5664	0.0169333	0.0317703	0.0970769	0.5495
CV	P2003			0.224163	0.434271	0.123197	0.164363	0.173648	1.94216	0.693252	0.702036	0.637237	0.566036
4M1	M	2004	1	39	24	16.94	14.36	11.26	1.957	1.594	0.006	0.054
4M2	M	2004	1	32	14	14.81	12.39	12.73	2.053	1.466	0.037	0.099
4M3	M	2004	2	50	45	14.47	12.75	12.85	3.205	2.064	0.075	0.039
4M4	M	2004	0	36	20	17.05	13.41	13.75	3.205	2.279	0.008	0.037
4M5	M	2004	0	40	33	18	14.98	16.2	2.262	2.205	0.006	0.018
4M6	M	2004	0	46	33	16.98	12.65	15.62	1.866	1.197	0.009	0.011
4M7	M	2004	0	39	22	15.9	13.88	14.99	2.802	2.393	0.008	0.02
4M8	M	2004	3	42	31	16.86	12.03	13.86	2.117	1.439	0.006	0.017
4M9	M	2004	1	42	25	17.63	12.2	13.11	2.359	1.703	0.007	0.019
4M10	M	2004	3	46	34	20.43	16.63	15.22	3.205	2.947	0.002	0.038
4M11	M	2004	0	49	27	17.56	15.87	15.26	2.536	1.941	0.007	0.015
4M12	M	2004	0	39	36	17.85	13.46	16.83	2.42	2.172	0.002	0.014
4M13	M	2004	2	49	40	19.08	17.71	17.41	2.275	2.57	0.007	0.046
4M14	M	2004	1	40	27	15.64	13.2	12.85	2.443	1.518	0.039	0.014
4M15	M	2004	1	46	25	14.73	13.79	13.23	2.247	1.674	0.01	0.018
4M16	M	2004	0	55	33	19.46	16.98	15.3	2.658	2.289	0.014	0.016
4M17	M	2004	0	41	22	17.78	14.47	15.98	1.282	1.857	0.011	0.017
4M18	M	2004	2	40	36	15.9	12.79	14.27	2.456	1.284	0.012	0.017
4M19	M	2004	0	35	18	17.26	14.42	12.79	3.073	2.444	0.007	0.015
4M20	M	2004	0	36	21	12.76	12.24	11.29	3.205	2.174	0.009	0.013
4M21	M	2004	0	48	20	15.9	11.07	12.8	2.207	1.043	0.012	0.005
4M22	M	2004	15	58	55	19.56	15.05	13.4	3.205	2.535	0.012	0.015
4M23	M	2004	2	45	43	18.65	14.58	15.08	2.927	2.038	0.035	0.019
4M24	M	2004	15	51	51	15.44	13.73	12.81	2.55	1.475	0.018	0.005
4M25	M	2004	6	39	33	14.77	13.63	13.88	2.33	1.148	0.015	0.004
4M26	M	2004	4	38	33	15.81	12.07	14.14	1.997	1.267	0.014	0.009
4M27	M	2004	0	45	37	12.72	11.87	15.2	2.434	1.288	0.015	0.008
4M28	M	2004	3	37	24	18.68	13.64	14.04	2.464	1.369	0.016	0.018
4M29	M	2004	0	35	23	17.16	12.74	15.36	3.205	1.677	0.015	0.008
4M30	M	2004	0	33	45	14.71	12.57	5.98	2.952	1.515	0.044	0.011
4M31	M	2004	1	37	27	17.25	12.79	14.56	2.56	1.658	0.016	0.012
4M32	M	2004	1	36	18	17.16	12.77	12.24	1.716	0.874	0.012	0.011
4M33	M	2004	3	31	15	15.81	13.04	13.33	1.891	1.201	0.017	0.013
4M34	M	2004	1	35	20	19.25	13.46	12.91	3.205	1.679	0.017	0.013
4M35	M	2004	7	38	23	15.95	12.28	13.22	3.205	2.721	0.015	0.009
4M36	M	2004	5	40	32	15.62	12.86	12.92	2.989	1.727	0.022	0.008
4M37	M	2004	2	36	27	13.06	12.64	14.6	3.033	1.792	0.018	0.007
4M38	M	2004	4	39	29	13.74	11.49	12.67	1.974	0.67	0.02	0.005
4M39	M	2004	5	44	47	16.14	15.48	12.33	2.877	1.49	0.022	0.008
4M40	M	2004	3	37	26	15.27	14.12	16.45	3.048	2.003	0.025	0.008
4M41	M	2004	1	35	16	15.76	14.01	15.45	2.811	2.349	0.026	0.005
4M42	M	2004	4	35	18	15.37	13.68	14.16	2.66	1.982	0.024	0.014
4M43	M	2004	6	44	38	15.26	14.5	16.95	3.205	2.342	0.028	0.014
4M44	M	2004	6	37	29	15.21	13.38	15.04	2.627	1.296	0.026	0.006
4M45	M	2004	10	51	49	16.35	14.67	14.25	3.205	2.174	0.022	0.005
4M46	M	2004	6	40	35	14.29	14.69	14.23	3.035	1.093	0.025	0.005
4M47	M	2004	8	46	44	15.03	13.43	14.85	3.205	1.511	0.018	0.017
4M49	M	2004	4	40	20	13.83	13.07	15.07	2.612	2.046	0.027	0.011
4M50	M	2004	0	36	34	15.61	13.26	13.24	1.929	1.252	0.018	0.006
4M51	M	2004	4	39	19	13.87	13.41	15.83	2.606	1.377	0.012	0.018
4M52	M	2004	1	34	24	13.54	12.99	12.35	1.957	1.208	0.012	0.016
4M53	M	2004	3	36	22	15.22	13.82	15.25	1.924	1.468	0.066	0.015
4M54	M	2004	1	37	21	15.83	12.73	14.44	2.306	1.279	0.027	0.015
4M55	M	2004	0	41	34	14.99	13.79	14.09	2.331	1.354	0.027	0.01
4M56	M	2004	4	51	33	17.05	12.16	15.37	2.109	1.025	0.031	0.014
4M57	M	2004	4	45	27	14.68	13.61	13.68	2.155	1.621	0.025	0.014
4M58	M	2004	0	47	20	15.29	14.42	14.16	2.343	1.476	0.023	0.013
4MS1	M	2004	0	34	25	14.64	12.17	12.51	2.788	2.51	0.005	0.012
4MS2	M	2004	0	21	8	12.32	10.55	12.41	2.046	1.127	0.012	0.017
4MS3	M	2004	0	21	8	13.31	11.67	11.47	3.218	1.886	0.001	0.01
4MS4	M	2004	0	24	14	11.35	10.3	12.29	2.055	1.003	0.004	0.018
4MS5	M	2004	0	30	13	14.66	12.26	12.98	3.209	2.346	0.004	0.015
4MS6	M	2004	0	26	10	12.16	12.08	13.56	1.94	0.841	0.005	0.008
4MS7	M	2004	0	26	9	11.81	10.58	11	2.997	2.178	0.002	0.006
4MS8	M	2004	1	21	10	15.34	12.36	13.15	2.551	1.871	0.006	0.01
4MS9	M	2004	0	24	8	14.51	9.97	12.2	2.594	1.946	0.001	0.011
4MS10	M	2004	3	23	16	12.44	9.6	12.05	2.276	1.34	0.003	0.015
4MS11	M	2004	0	21	13	12.25	11.59	12.81	2.09	1.661	0.002	0.01
4MS12	M	2004	0	22	11	13.89	12.27	12.01	2.439	1.889	0.004	0.01
4MS13	M	2004	3	30	19	12.68	10.68	10.85	2.325	2.125	0.003	0.009
4MS14	M	2004	2	27	17	12.19	10.75	10.77	1.46	0.898	0	0.006
4MS15	M	2004	0	21	9	12.54	11.34	10.99	2.249	1.22	0.005	0.007
4MS16	M	2004	1	22	8	9.91	9.64	9.34	2.073	1.095	0.006	0.007
4MS17	M	2004	0	27	16	11.5	11.55	10.62	2.298	1.449	0.004	0.002
4MS18	M	2004	1	26	9	12.46	13.13	11.61	2.503	1.45	0.004	0.004
4MS19	M	2004	0	18	9	9.92	10.69	9.52	2.181	1.682	0.007	0.006
4MS20	M	2004	0	25	22	12.58	9.88	11.18	1.778	0.873	0.009	0.012
4MS21	M	2004	0	22	11	11.09	11.01	11.76	1.96	1.173	0.004	0.004
4MS22	M	2004	0	27	13	14.29	11.37	11.47	2.532	2.278	0.004	0.007
4MS23	M	2004	1	32	13	12.81	11.46	11.5	2.457	1.532	0.001	0.009
4MS24	M	2004	2	35	21	12.47	10.63	9.9	2.573	1.22	0.009	0.018
4MS25	M	2004	0	25	9	12.73	13.18	13.18	2.667	1.443	0.001	0.012
4MS26	M	2004	0	27	10	14.74	12.82	13.42	1.599	1.096	0.006	0.012
4MS27	M	2004	3	26	16	15.74	15.65	15.21	2.221	1.704	0.005	0.015
4MS28	M	2004	0	25	17	12.35	11.52	10.92	1.345	1.019	0	0.018
4MS29	M	2004	1	27	11	12.86	12.75	13.52	3.218	2.302	0.018	0.011
4MS30	M	2004	1	30	17	15.84	13.54	11.76	2.482	1.791	0.003	0.017
4MS31	M	2004	0	28	17	14.24	12.02	12.57	2.865	1.924	0.001	0.006
4MS32	M	2004	0	19	8	13.16	12.42	11.38	2.797	1.679	0	0.006
4MS33	M	2004	2	22	14	15.11	11.69	14.26	2.131	1.383	0.003	0.015
4MS34	M	2004	3	25	11	12.02	11.42	13.27	3.142	2.072	0.004	0.01
4MS35	M	2004	1	30	19	15.18	13.41	14.51	3.218	2.932	0.003	0.012
4MS38	M	2004	2	25	16	14.76	11.81	11.21	2.194	1.603	0.005	0.007
4MS40	M	2004	0	17	11	11.43	11.68	13.48	2.076	1.296	0.006	0.008
4MS41	M	2004	2	21	13	16.95	13.36	13.49	3.108	1.859	0.01	0.02
4MS43	M	2004	2	34	16	14.42	12.07	11.85	2.386	1.578	0.013	0.007
4MS44	M	2004	0	26	11	15.38	13.77	13.44	2.52	1.493	0.021	0.008
4MS45	M	2004	0	29	14	15.22	12.8	13.35	2.708	1.488	0.013	0.006
4MS46	M	2004	0	26	12	16.19	13.89	14.39	2.632	1.697	0.012	0.012
4MS48	M	2004	0	22	16	13.83	11.37	11.97	2.262	1.536	0.009	0.013
5MS1	M	2004	14	40	21	14.43	15.84	13.67	2.965	2.259	0.005	0.019
5MS2	M	2004	4	47	29	12.41	12.53	12.74	1.902	1.407	0.039	0.012
5MS3	M	2004	11	39	33	13.22	14.16	14.24	3.216	2.073	0.009	0.004
5MS4	M	2004	3	31	14	13.98	12.21	13.15	3.216	2.587	0.006	0.004
5MS5	M	2004	5	31	12	16.94	14.24	13.26	2.121	1.169	0.003	0.015
5MS6	M	2004	5	32	14	16.02	15.03	16.24	2.269	1.603	0.003	0.05
5MS7	M	2004	1	24	13	15.55	13.01	13.13	2.335	1.163	0.001	0.011
5MS8	M	2004	6	40	23	17.86	15.03	12.67	2.618	3.123	0.01	0.011
5MS10	M	2004	2	31	15	12.92	13.54	13.43	3.133	1.918	0.01	0.008
5MS11	M	2004	5	30	11	15.84	16.88	14.32	3.216	2.305	0.012	0.011
5MS12	M	2004	11	37	25	15.05	13.64	14.06	2.79	1.417	0.001	0.008
5MS13	M	2004	3	28	12	15.16	13.59	11.5	2.62	1.696	0.012	0.023
5MS14	M	2004	4	34	16	13.41	13.88	12.6	2.852	1.269	0.004	0.01
5MS15	M	2004	2	29	12	13.16	13.68	12.45	2.944	1.831	0.003	0.009
5MS16	M	2004	5	39	20	15.25	15.34	14.11	3.123	2.415	0.005	0.011
5MS17	M	2004	1	32	19	13.54	13.57	13.59	3.216	1.661	0.007	0.011
5MS18	M	2004	5	38	24	14.37	12.56	12.82	3.014	1.269	0	0.005
5MS19	M	2004	2	30	11	15.84	14.54	12.55	2.138	1.489	0	0.008
5MS20	M	2004	2	37	17	16.26	13.4	13.82	3.153	1.443	0.003	0.005
5MS21	M	2004	16	49	30	17.33	15.96	12.61	2.069	2.038	0.004	0.04
5MS22	M	2004	14	48	45	16.95	15.89	12.69	2.323	1.76	0.004	0.021
5MS23	M	2004	6	29	28	15.77	13.79	12.99	3.216	2.191	0.005	0.013
5MS24	M	2004	5	27	22	15.93	13.31	12.36	3.019	1.919	0.008	0.009
5MS25	M	2004	4	42	29	15.73	15.85	14.73	2.483	1.673	0.009	0.017
5MS26	M	2004	3	48	28	17.01	15.44	13.97	3.216	2.174	0.015	0.024
5MS27	M	2004	2	26	16	12.03	12.38	11.78	2.968	1.211	0.019	0.009
5MS28	M	2004	0	26	17	13.49	11.14	11.51	3.216	1.644	0.013	0.007
5MS29	M	2004	6	38	16	14.95	13.99	13.47	2.8	1.558	0.019	0.012
5MS30	M	2004	2	43	24	16.13	13.81	13.08	3.216	1.8	0.01	0.022
5MS31	M	2004	3	34	15	13.73	15.53	13.76	2.951	1.269	0.019	0.019
5MS32	M	2004	9	44	37	13.71	13.5	15.28	3.216	1.58	0.018	0.016
5MS33	M	2004	3	32	18	17.62	14.97	13.99	1.985	1.751	0.016	0.017
5MS36	M	2004	6	54	42	13.61	13.43	12.88	3.216	2.005	0.012	0.009
SD	M2004			9.03091	10.6787	2.0452	1.58346	1.66244	0.48739	0.47937	0.0117698	0.0114209
MEAN	M2004			34.7068	22.218	14.9428	13.1434	13.276	2.57378	1.69467	0.0123383	0.0139023
CV	M2004			0.260206	0.480634	0.136869	0.120476	0.125222	0.189367	0.282869	0.953922	0.821515	0.374564
4PS2	P	2004	1	11	5	16.95	11.56	14.61	0.019	0.066	0.17	0.5
4PS3	P	2004	1	13	4	13.61	10.65	15.3	0.009	0.029	0.269	0.648
4PS4	P	2004	1	13	4	14.83	11.6	17.61	0.01	0.047	0.136	0.561
4PS5	P	2004	2	15	6	18.32	12.83	17.31	0.015	0.039	0.273	0.82
4PS7	P	2004	1	13	6	18.1	12.21	17.04	0.011	0.036	0.194	0.538
4PS8	P	2004	0	14	8	18.67	13.82	21.44	0.008	0.037	0.214	0.648
4PS10	P	2004	0	15	6	14.2	11.5	18.83	0.006	0.026	0.177	0.501
4PS11	P	2004	0	13	4	14.22	10.4	18.7	0.004	0.025	0.178	0.425
4PS12	P	2004	0	12	5	17	12.4	16.92	0.01	0.02	0.212	0.445
4PS14	P	2004	0	12	6	15.85	13.12	19.38	0.012	0.019	0.115	0.551
4PS15	P	2004	0	13	4	15.07	11.38	15.73	0.006	0.018	0.111	0.355
4PS16	P	2004	2	15	8	16.17	10.94	16.43	0.015	0.05	0.256	0.567
4PS17	P	2004	1	17	6	15.57	10.86	17.46	0.011	0.047	0.223	0.704
4PS19	P	2004	1	18	8	14.99	11.39	16.99	0.008	0.034	0.263	0.519
4PS20	P	2004	1	19	7	15.96	12.71	17.78	0.006	0.027	0.217	0.686
4PS21	P	2004	0	15	8	14.83	11.72	19.32	0.011	0.06	0.116	0.782
4PS23	P	2004	3	14	8	17.18	12.97	14.71	0.009	0.032	0.305	1.064
4PS24	P	2004	1	13	4	15.41	9.52	15.81	0.011	0.028	0.347	0.728
4PS26	P	2004	1	15	6	15.91	11.29	20.2	0.005	0.043	0.137	0.612
4PS30	P	2004	2	16	5	16.73	11.01	20.54	0.013	0.032	0.263	0.8
4PS33	P	2004	3	20	9	17.68	12.79	16.76	0.014	0.054	0.271	1.072
4PS34	P	2004	0	14	6	15.3	10.87	16.37	0.006	0.044	0.262	0.754
4PS36	P	2004	1	14	6	15.35	11.17	13.5	0.013	0.057	0.274	0.75
4PS37	P	2004	0	17	12	16.49	12.24	19.57	0.018	0.043	0.165	0.554
4PS39	P	2004	0	18	8	18.84	12.45	22.05	0.008	0.027	0.184	0.554
4PS41	P	2004	0	17	6	13.44	12.3	13.47	0.011	0.02	0.049	0.121
4PS42	P	2004	0	15	5	12.4	8.92	NA	0.004	0.021	0.056	0.182
4PS43	P	2004	0	14	5	15.41	12.88	14.77	0.009	0.067	0.048	0.115
4PS44	P	2004	3	20	8	16.26	11.31	14.7	0.004	0.026	0.069	0.286
4PS45	P	2004	3	19	11	15.77	11.7	17.14	0.025	0.061	0.083	0.39
4PS46	P	2004	0	15	6	15.26	12.96	15.55	0.006	0.066	0.196	0.752
4PS47	P	2004	1	14	11	14.99	11.39	14.74	0.008	0.027	0.185	0.73
4PS48	P	2004	0	12	5	14.51	10.04	14.41	0.005	0.036	0.119	0.577
4PS49	P	2004	0	14	6	13.41	9.86	9.98	0.006	0.024	0.096	0.397
4PS50	P	2004	2	15	11	14.39	9.75	15.31	0.007	0.036	0.17	0.848
5PS1	P	2004	3	16	9	16	11.86	17.82	0.009	0.028	0.113	0.367
5PS2	P	2004	3	14	7	17.24	12.73	17.21	0.011	0.057	0.159	0.351
5PS3	P	2004	1	15	5	15.14	9.96	16.39	0.009	0.038	0.099	0.282
5PS4	P	2004	1	17	8	16.63	10.89	15.56	0.007	0.043	0.169	0.63
5PS5	P	2004	0	10	5	14.78	9.91	14.77	0.011	0.036	0.163	0.475
5PS7	P	2004	2	17	6	15.4	10.61	15.58	0.011	0.045	0.291	0.531
5PS8	P	2004	0	14	5	15.54	11.54	16.99	0.014	0.05	0.137	0.618
5PS9	P	2004	1	15	5	15.06	11.77	16.59	0.009	0.049	0.123	0.62
5PS10	P	2004	2	16	9	17.61	10.89	18.08	0.007	0.032	0.117	0.352
5PS11	P	2004	1	18	7	14.73	11.14	19.43	0.008	0.033	0.064	0.466
5PS12	P	2004	0	15	5	14.78	10.73	16.92	0.009	0.021	0.14	0.259
5PS13	P	2004	2	16	6	14.58	10.99	16.97	0.006	0.035	0.115	0.601
5PS14	P	2004	0	16	5	16.01	12.77	19.1	0.004	0.023	0.105	0.391
5PS15	P	2004	0	15	3	16.52	13.14	17.28	0.007	0.024	0.157	0.478
5PS16	P	2004	1	16	5	15.6	11.41	15.35	0.011	0.032	0.122	0.802
5PS17	P	2004	2	17	10	17.23	11.23	15.34	0.019	0.064	0.414	0.829
5PS18	P	2004	1	16	12	16.78	12.53	16.26	0.009	0.045	0.157	NA
5PS19	P	2004	3	20	17	17.27	12.28	19.56	0.01	0.041	0.182	0.524
5PS20	P	2004	0	14	5	18.41	12.1	17.36	0.008	0.022	0.097	0.442
5PS21	P	2004	1	20	12	16.58	11.07	16.06	0.006	0.055	0.14	0.584
5PS22	P	2004	0	13	7	14.84	11.47	13.76	0.01	0.033	0.171	0.573
5PS23	P	2004	0	13	5	17.53	11.87	15.72	0.011	0.059	0.167	0.572
5PS24	P	2004	1	17	4	17.17	12.79	18.45	0.006	0.05	0.172	0.703
5PS25	P	2004	2	14	7	14.72	10.11	17.93	0.006	0.024	0.142	0.544
5PS27	P	2004	2	19	5	19.81	12.33	17.27	0.01	0.04	0.286	0.89
5PS28	P	2004	3	20	11	14.48	10.39	14.8	0.01	0.05	0.206	0.595
5PS29	P	2004	0	16	7	15.5	11.17	16.99	0.01	0.06	0.183	0.562
5PS30	P	2004	0	19	7	19.43	12.68	19.71	0.016	0.057	0.29	0.764
5PS31	P	2004	3	17	9	15.81	12.08	19.22	0.01	0.06	0.194	0.862
5PS32	P	2004	1	20	10	17.31	11.77	17.68	0.007	0.038	0.156	0.741
5PS34	P	2004	1	14	9	17.61	12.65	17.09	0.007	0.026	0.185	0.62
5PS35	P	2004	2	14	5	16.66	10.82	16.82	0.008	0.027	0.248	0.575
5PS37	P	2004	0	14	4	16.14	12.73	16.55	0.008	0.032	0.166	0.365
5PS39	P	2004	1	19	9	14.38	9.92	15.19	0.011	0.049	0.224	0.7
5PS40	P	2004	2	19	8	18.45	13.15	19.5	0.006	0.036	0.109	0.805
5PS41	P	2004	1	17	5	16.33	11.8	17.12	0.008	0.041	0.188	0.705
5PS42	P	2004	0	15	6	16.2	12.81	16.43	0.008	0.037	0.176	0.483
5PS43	P	2004	2	19	9	17.05	12.59	19.25	0.007	0.018	0.187	0.484
5PS44	P	2004	0	16	10	12.84	11.08	16.61	0.015	0.038	0.349	0.66
5PS45	P	2004	0	21	9	16.6	12.02	16.69	0.011	0.028	0.182	0.651
5PS46	P	2004	5	25	11	18.09	11.96	18.77	0.011	0.046	0.308	0.941
5PS47	P	2004	4	22	9	17.05	12.64	16.94	0.011	0.079	0.193	0.547
5PS48	P	2004	1	16	7	16.88	12.26	16.99	0.01	0.034	0.251	0.814
5PS49	P	2004	3	21	8	16.05	12.47	17.15	0.006	0.041	0.171	0.591
5PS50	P	2004	0	18	7	15.92	13.72	16.7	0.014	0.067	0.336	0.606
4P8	P	2004	0	9	3	15.49	11.12	16.65	0.008	0.018	0.193	0.476
4P9	P	2004	0	9	3	13.58	9.87	16.2	0.006	0.024	0.176	0.401
4P10	P	2004	1	11	5	12.87	10.36	14.07	0.007	0.033	0.184	0.525
4P11	P	2004	0	9	3	14.59	10.85	16.64	0.008	0.03	0.155	0.454
4P12	P	2004	3	17	7	13.61	10.44	15.31	0.005	0.024	0.099	0.424
4P13	P	2004	2	12	5	15.18	10.32	15.99	0.007	0.019	0.103	0.338
4P14	P	2004	2	14	5	13.21	9	12.63	0.006	0.029	0.119	0.349
4P15	P	2004	1	16	7	13.32	9.98	18.66	0.005	0.02	0.191	0.536
4P16	P	2004	0	14	3	17.36	13.16	14.83	0.006	0.024	0.137	0.264
4P17	P	2004	0	12	4	14.72	9.83	16.37	0.005	0.015	0.122	0.372
4P18	P	2004	3	20	9	13.87	9.16	14.94	0.011	0.038	0.166	0.477
4P19	P	2004	1	10	4	15.26	10.55	15.58	0.008	0.05	0.167	0.491
4P20	P	2004	1	11	4	12.47	9.8	15.44	0.008	0.016	0.22	0.463
4P21	P	2004	0	9	4	14.89	10.66	17.16	0.006	0.027	0.145	0.516
4P22	P	2004	0	12	5	16.05	11.81	17.32	0.006	0.03	0.166	0.713
4P23	P	2004	0	12	4	14.33	10.43	13.75	0.006	0.036	0.127	0.448
4P24	P	2004	0	11	4	13.37	10.27	15.63	0.01	0.035	0.271	0.393
4P25	P	2004	0	10	4	13.22	9.99	16.72	0.006	0.021	0.21	0.4
4P26	P	2004	1	12	5	17.05	12.24	15.12	0.007	0.059	0.245	0.541
4P27	P	2004	1	16	11	16.93	12.01	16.52	0.011	0.042	0.368	0.576
4P28	P	2004	0	10	4	12.11	10.3	12.99	0.006	0.043	0.277	0.374
4P29	P	2004	1	12	5	14.73	10.83	14.68	0.005	0.039	0.287	0.321
4P30	P	2004	0	11	5	13.21	9.81	12.26	0.008	0.032	0.278	0.449
4P31	P	2004	0	11	6	11.21	9.53	11.47	0.006	0.025	0.267	0.521
4P32	P	2004	1	10	3	14.96	10.89	13.84	0.008	0.029	0.284	0.565
4P33	P	2004	0	11	6	15.84	11.52	20.23	0.006	0.026	0.246	0.452
4P34	P	2004	0	9	4	12.8	9.72	15.26	0.012	0.017	0.194	0.384
4P35	P	2004	0	9	4	12.36	9.79	13.34	0.005	0.032	0.177	0.314
4P36	P	2004	2	14	9	14.3	10.55	17.54	0.009	0.017	0.238	0.589
4P37	P	2004	0	10	5	11.63	9.87	16.85	0.005	0.011	0.297	0.356
4P38	P	2004	0	12	5	12.66	10.43	17.11	0.009	0.012	0.209	0.432
4P39	P	2004	0	12	5	14.14	10.97	15.55	0.006	0.027	0.209	0.456
4P40	P	2004	1	12	5	15.82	10.73	14.5	0.008	0.036	0.218	0.498
4P41	P	2004	0	12	4	12.82	10.44	13.23	0.006	0.024	0.18	0.384
4P42	P	2004	0	12	5	15.28	11.73	17.78	0.006	0.054	0.183	0.488
4P44	P	2004	0	13	5	14.37	11.29	20.28	0.009	0.029	0.122	0.47
4P46	P	2004	0	8	3	15.59	10.7	16.5	0.006	0.019	0.123	0.545
4P47	P	2004	0	10	4	14.61	10.71	16.79	0.007	0.03	0.137	0.455
4P48	P	2004	2	10	5	13.36	11.55	15.37	0.009	0.033	0.183	0.72
4P49	P	2004	4	15	6	15.15	9.93	16.23	0.006	0.028	0.108	0.447
4P52	P	2004	1	9	4	13.63	10.4	16.65	0.012	0.038	0.179	0.499
SD	P2004			3.36675	2.47895	1.71074	1.10523	2.02045	0.00344906	0.0140273	0.0710723	0.175751
MEAN	P2004			14.5207	6.34711	15.4195	11.2965	16.5197	0.0087686	0.0360165	0.187331	0.544725
CV	P2004			0.231859	0.390563	0.110947	0.097838	0.122306	0.393342	0.38947	0.379395	0.322641	0.270929

## Sheet: Coefficient of variation
SD	M2002			7.17846	12.1028	1.74025	1.52492	1.73101	0.405222	0.58252	0.024191	0.0255746
MEAN	M2002			33.9306	26.4722	13.9413	13.6897	13.5394	2.55213	1.88436	0.03525	0.0373472
CV	M2002			0.211563	0.457189	0.124827	0.111391	0.127849	0.158778	0.309134	0.686269	0.68478	0.319087
SD	P2002			4.00609	3.1805	2.04065	1.26538	2.45588	0.0219787	0.0415233	0.0465654	0.171275
MEAN	P2002			13.8454	7.31959	14.653	12.0632	17.8015	0.0198791	0.0578901	0.108868	0.33989
CV	P2002			0.289345	0.434518	0.139265	0.104896	0.137959	1.10562	0.717279	0.427723	0.503912	0.428946
SD	M2003			8.41985	9.38062	2.29076	1.4998	1.9481	0.644625	0.550638	0.0136083	0.0161119
MEAN	M2003			28.892	21.6307	11.8345	11.6395	10.1309	1.92807	1.25052	0.0235071	0.0251071
CV	M2003			0.291425	0.433672	0.193566	0.128854	0.192293	0.334336	0.440327	0.578902	0.641725	0.359456
SD	P2003			3.36338	2.29673	1.72712	1.97727	2.70307	0.0328873	0.0220248	0.0681515	0.350162
MEAN	P2003			15.0042	5.2887	14.0191	12.0299	15.5664	0.0169333	0.0317703	0.0970769	0.5495
CV	P2003			0.224163	0.434271	0.123197	0.164363	0.173648	1.94216	0.693252	0.702036	0.637237	0.566036
SD	M2004			9.03091	10.6787	2.0452	1.58346	1.66244	0.48739	0.47937	0.0117698	0.0114209
MEAN	M2004			34.7068	22.218	14.9428	13.1434	13.276	2.57378	1.69467	0.0123383	0.0139023
CV	M2004			0.260206	0.480634	0.136869	0.120476	0.125222	0.189367	0.282869	0.953922	0.821515	0.374564
SD	P2004			3.36675	2.47895	1.71074	1.10523	2.02045	0.00344906	0.0140273	0.0710723	0.175751
MEAN	P2004			14.5207	6.34711	15.4195	11.2965	16.5197	0.0087686	0.0360165	0.187331	0.544725
CV	P2004			0.231859	0.390563	0.110947	0.097838	0.122306	0.393342	0.38947	0.379395	0.322641	0.270929
												MAS	0.351036
												PAU	0.42197
